# Supplementary material
Source: publisher figshare collection journal article supplement (https://geolsoc.figshare.com/ndownloader/files/25790234)
Supplement: Supplementary file 1 [file 25790234]

## Sheet: Table sorted by reference
Long	Lat	System	Mineral	Age	Error	Unit	Megaunit	Sample	Reference	Comment
4.9061	61.3379	Ar-Ar	White mica	446	4	Dalsfjord Suite–Høyvik Group	Caledonian nappes	ATL-34	Andersen 1998
4.9988	61.3782	Ar-Ar	White mica	444	4	Dalsfjord Suite–Høyvik Group	Caledonian nappes	ATL-35	Andersen 1998
5.3326	61.4592	Ar-Ar	White mica	440	4	Dalsfjord Suite–Høyvik Group	Caledonian nappes	KVA-57	Andersen 1998
5.0867	60.5624	Ar-Ar	White mica	462.6	0.8	Lindås Nappe	Caledonian nappes	BA22/89	Boundy, 1996
4.979	60.7833	Ar-Ar	Hornblende	455.4	1.5	Lindås Nappe	Caledonian nappes	BA48/92	Boundy, 1996
5.0489	60.552	Ar-Ar	White mica	451.3	1.1	Lindås Nappe	Caledonian nappes	BA31/92	Boundy, 1996
5.0305	60.5718	Ar-Ar	Hornblende	447.7	4.2	Lindås Nappe	Caledonian nappes	BA1/92	Boundy, 1996
5.1677	60.6004	Ar-Ar	Hornblende	439.3	3.5	Lindås Nappe	Caledonian nappes	BA45/92	Boundy, 1996
5.0353	60.5737	Ar-Ar	White mica	432.4	1.6	Lindås Nappe	Caledonian nappes	BA1/92	Boundy, 1996
5.035	60.5708	Ar-Ar	White mica	429	2	Lindås Nappe	Caledonian nappes	BA1/92	Boundy, 1996
5.0378	60.5716	Ar-Ar	White mica	428.9	1.5	Lindås Nappe	Caledonian nappes	BA1/92	Boundy, 1996
4.8501	60.6273	Ar-Ar	Hornblende	497.9	1.9	Øygarden Complex	Caledonized basement	BA21/92	Boundy, 1996
5.3587	60.7588	Ar-Ar	Hornblende	409.3	2.7	Western Gneiss Region	Caledonized basement	BA53/92	Boundy, 1996
4.8048	60.5699	Ar-Ar	Hornblende	408.1	3.4	Øygarden Complex	Caledonized basement	BA18/92	Boundy, 1996
5.3597	60.844	Ar-Ar	Hornblende	394.8	2.2	Western Gneiss Region	Caledonized basement	BA55/92	Boundy, 1996
6.43951	62.7316	U-Pb	Zircon	394	6	Western Gneiss Region	Caledonized basement	JB10-62	Butler 2018
6.44272	62.7284	U-Pb	Zircon	388	1.3	Western Gneiss Region	Caledonized basement	JB10-57	Butler 2018
6.44963	62.7263	U-Pb	Zircon	392	15	Western Gneiss Region	Caledonized basement	JB10-51	Butler 2018
5.3003	61.1947	Ar-Ar	White mica	403.3	0.7	Hyllestad complex	Caledonian nappes	M5	Chauvet and Dallmeyer, 1992
5.5621	61.6114	Ar-Ar	White mica	402.9	1.1	Lykkjebø Group (M. Allochthon)	Caledonian nappes	M7	Chauvet and Dallmeyer, 1992
5.3093	61.6416	Ar-Ar	White mica	399.2	0.7	Eikefjord Group (M. Allochthon)	Caledonian nappes	M8	Chauvet and Dallmeyer, 1992
6.3386	61.7526	Ar-Ar	White mica	393	0.7	Lower Allochthon	Caledonian nappes	M6	Chauvet and Dallmeyer, 1992
5.6738	61.1496	Ar-Ar	Hornblende	556.4	1.9	Western Gneiss Region	Caledonized basement	H1	Chauvet and Dallmeyer, 1992
6.7253	61.1839	Ar-Ar	White mica	441.6	1	Western Gneiss Region	Caledonized basement	M1	Chauvet and Dallmeyer, 1992
5.3204	61.8657	Ar-Ar	Hornblende	421.1	0.8	Western Gneiss Region	Caledonized basement	H5	Chauvet and Dallmeyer, 1992
6.6172	61.8988	Ar-Ar	Hornblende	414.8	6.2	Western Gneiss Region	Caledonized basement	H4	Chauvet and Dallmeyer, 1992
5.3663	61.1551	Ar-Ar	Hornblende	410.6	1.5	Western Gneiss Region	Caledonized basement	H3	Chauvet and Dallmeyer, 1992
5.3663	61.1551	Ar-Ar	White mica	403.6	1.1	Western Gneiss Region	Caledonized basement	M3	Chauvet and Dallmeyer, 1992
5.3454	61.1591	Ar-Ar	White mica	399.1	0.8	Western Gneiss Region	Caledonized basement	M4	Chauvet and Dallmeyer, 1992
5.4749	61.1158	Ar-Ar	White mica	395.2	1.3	Western Gneiss Region	Caledonized basement	M2	Chauvet and Dallmeyer, 1992
5.569	61.1218	Ar-Ar	Hornblende	394.7	3.5	Western Gneiss Region	Caledonized basement	H2	Chauvet and Dallmeyer, 1992
5.3231	61.8595	Ar-Ar	White mica	385.1	0.7	Western Gneiss Region	Caledonized basement	M9	Chauvet and Dallmeyer, 1992
6.73855	62.7329	U-Pb	Rutile	375	4	Western Gneiss Region	Caledonized basement	15-02-RT	Cutts 2019	approximate locations
6.68887	62.727	U-Pb	Rutile	379	4	Western Gneiss Region	Caledonized basement	14-03-MA	Cutts 2019	approximate locations
6.41686	62.7047	U-Pb	Rutile	381	6	Western Gneiss Region	Caledonized basement	15-05-FJ	Cutts 2019	approximate locations
6.99678	62.3129	U-Pb	Rutile	379	4	Western Gneiss Region	Caledonized basement	15-10-ST	Cutts 2019	approximate locations
6.86674	62.087	U-Pb	Rutile	399	6	Western Gneiss Region	Caledonized basement	15-14-HE	Cutts 2019	approximate locations
7.64974	62.0053	U-Pb	Rutile	398	9	Western Gneiss Region	Caledonized basement	15-13-GR	Cutts 2019	approximate locations
11.4229	63.7979	Ar-Ar	Hornblende	477	3	Seve nappe	Caledonian nappes	4A	Dallmeyer 1990
11.3949	63.9495	Ar-Ar	Hornblende	435	4	Seve nappe	Caledonian nappes	2A	Dallmeyer 1990
11.9008	63.7007	Ar-Ar	Hornblende	432	3	Seve nappe	Caledonian nappes	5	Dallmeyer 1990
12.3009	64.3006	Ar-Ar	Hornblende	429	1	Møre Trøndelag Fault Zone	Caledonian nappes	1	Dallmeyer 1990
11.9008	63.7007	Ar-Ar	Biotite	427	1	Seve nappe	Caledonian nappes	5	Dallmeyer 1990
12.301	63.77	Ar-Ar	Hornblende	427	3	Seve nappe	Caledonian nappes	6	Dallmeyer 1990
11.3715	63.8007	Ar-Ar	Hornblende	424	5	Seve nappe	Caledonian nappes	3	Dallmeyer 1990
11.3737	63.8016	Ar-Ar	White mica	421	2	Seve nappe	Caledonian nappes	3B	Dallmeyer 1990
11.9008	63.7007	Ar-Ar	White mica	419	1	Seve nappe	Caledonian nappes	5	Dallmeyer 1990
12.4077	64.3495	Ar-Ar	Hornblende	440	2	Møre Trøndelag Fault Zone	Caledonian nappes	21	Dallmeyer 1992
10.2898	64.1833	Ar-Ar	Hornblende	419	15	Northern Western Gneiss Region	Caledonized basement	4	Dallmeyer 1992
12.0009	64.3302	Ar-Ar	Hornblende	411	1	Northern Western Gneiss Region	Caledonized basement	16	Dallmeyer 1992
11.2797	64.1006	Ar-Ar	Hornblende	407	1	Møre Trøndelag Fault Zone	Caledonized basement	11	Dallmeyer 1992
11.5022	64.5201	Ar-Ar	Hornblende	406	3	Northern Western Gneiss Region	Caledonized basement	15A	Dallmeyer 1992
11.3124	64.1792	Ar-Ar	Hornblende	402	2	Northern Western Gneiss Region	Caledonized basement	9	Dallmeyer 1992
11.2602	64.1699	Ar-Ar	Hornblende	400	2	Northern Western Gneiss Region	Caledonized basement	10A	Dallmeyer 1992
10.1634	64.1099	Ar-Ar	Hornblende	399	13	Northern Western Gneiss Region	Caledonized basement	2	Dallmeyer 1992
11.17	64.2498	Ar-Ar	Hornblende	396	2	Northern Western Gneiss Region	Caledonized basement	8A	Dallmeyer 1992
11.3289	64.4802	Ar-Ar	Hornblende	396	2	Northern Western Gneiss Region	Caledonized basement	14	Dallmeyer 1992
10.8113	64.2501	Ar-Ar	Hornblende	396	2	Northern Western Gneiss Region	Caledonized basement	7	Dallmeyer 1992
11.2614	64.169	Ar-Ar	Biotite	395	1	Northern Western Gneiss Region	Caledonized basement	10B	Dallmeyer 1992
12.169	64.4193	Ar-Ar	White mica	395	2	Northern Western Gneiss Region	Caledonized basement	18B	Dallmeyer 1992
10.7488	64.2202	Ar-Ar	Hornblende	393	3	Northern Western Gneiss Region	Caledonized basement	6	Dallmeyer 1992
11.4294	64.5199	Ar-Ar	White mica	393	2	Northern Western Gneiss Region	Caledonized basement	15B	Dallmeyer 1992
11.2506	64.1699	Ar-Ar	White mica	393	1	Northern Western Gneiss Region	Caledonized basement	10B	Dallmeyer 1992
11.3807	64.4299	Ar-Ar	White mica	392	2	Northern Western Gneiss Region	Caledonized basement	13	Dallmeyer 1992
11.2192	64.2494	Ar-Ar	White mica	392	1	Northern Western Gneiss Region	Caledonized basement	8B	Dallmeyer 1992
12.2519	64.3486	Ar-Ar	White mica	390	2	Northern Western Gneiss Region	Caledonized basement	17	Dallmeyer 1992
5.9798	60.4748	Ar-Ar	White mica	402.7	0.9	Lower Bergsdalen Nappe	Caledonian nappes	1	Fossen and Dallmeyer, 1998
5.7568	60.2467	Ar-Ar	White mica	401.5	1.1	Intra-Bergsdalen Nappes decollement	Caledonian nappes	3	Fossen and Dallmeyer, 1998
5.992	60.3825	Ar-Ar	White mica	398.6	0.8	ntra-Bergsdalen Nappes decollement	Caledonian nappes	4	Fossen and Dallmeyer, 1998
6.0471	60.4754	Ar-Ar	White mica	398.1	0.8	Lower Bergsdalen Nappe	Caledonian nappes	2	Fossen and Dallmeyer, 1998
6.1786	60.64	Ar-Ar	Hornblende	1279	10	Lower Bergsdalen Nappe	Caledonian nappes	H8A	Fossen and Dunlap, 1998
6.5881	60.9848	Ar-Ar	Hornblende	912	4	Jotun Nappe	Caledonian nappes	H31	Fossen and Dunlap, 1998
5.392	60.2912	Ar-Ar	Hornblende	723	5	Lindås Nappe	Caledonian nappes	H36	Fossen and Dunlap, 1998
5.394	60.2904	Ar-Ar	Biotite	433	3	Lindås Nappe	Caledonian nappes	B36A	Fossen and Dunlap, 1998
9.0381	61.6688	Ar-Ar	White mica	415	2	Valdres Nappe	Caledonian nappes	M18B	Fossen and Dunlap, 1998
8.0393	61.5866	Ar-Ar	White mica	412	2	Valdres sparagmite	Caledonian nappes	M23	Fossen and Dunlap, 1998
5.3651	60.4199	Ar-Ar	Biotite	411	2	Rundemannen Fm.	Caledonian nappes	B2A	Fossen and Dunlap, 1998
5.3646	60.4202	Ar-Ar	White mica	411	2	Rundemannen Fm.	Caledonian nappes	M2A	Fossen and Dunlap, 1998
8.1823	61.6664	Ar-Ar	White mica	410	2	Valdres sparagmite	Caledonian nappes	M22	Fossen and Dunlap, 1998
6.1784	60.64	Ar-Ar	Biotite	408	6	Lower Bergsdalen Nappe	Caledonian nappes	B8A	Fossen and Dunlap, 1998
6.4013	60.9607	Ar-Ar	Biotite	402	2	Upper Bergsdalen Nappe	Caledonian nappes	B427	Fossen and Dunlap, 1998
8.2877	61.7026	Ar-Ar	White mica	402	3	Valdres sparagmite	Caledonian nappes	M21	Fossen and Dunlap, 1998
6.4013	60.9607	Ar-Ar	White mica	402	2	Upper Bergsdalen Nappe	Caledonian nappes	M427	Fossen and Dunlap, 1998
8.8155	61.2886	Ar-Ar	White mica	400	3	Valdres Nappe	Caledonian nappes	M16	Fossen and Dunlap, 1998
7.2946	61.3889	Ar-Ar	White mica	400	1	Decollement phyllite	Caledonian nappes	M27	Fossen and Dunlap, 1998
5.9936	60.5614	Ar-Ar	Biotite	398	3	Lower Bergsdalen Nappe	Caledonian nappes	B5	Fossen and Dunlap, 1998
5.9589	60.6397	Ar-Ar	Biotite	397	2	Lower Bergsdalen Nappe	Caledonian nappes	B33	Fossen and Dunlap, 1998
8.4486	61.7983	Ar-Ar	White mica	395	1	Decollement quartzite	Caledonian nappes	M20	Fossen and Dunlap, 1998
5.9589	60.6397	Ar-Ar	White mica	394	2	Lower Bergsdalen Nappe	Caledonian nappes	M33	Fossen and Dunlap, 1998
4.9358	60.4814	Ar-Ar	Hornblende	404	1	Øygarden Complex	Caledonized basement	H1E	Fossen and Dunlap, 1998
4.9346	60.4817	Ar-Ar	Biotite	401	5	Øygarden Complex	Caledonized basement	B1E	Fossen and Dunlap, 1998
5.418	60.1877	Ar-Ar	Biotite	417	1.6	Skarfjell Fm.	Caledonian nappes	97-6	Fossen and Dunlap, 2006
5.418	60.1877	Ar-Ar	Biotite	416.8	2	Skarfjell Fm.	Caledonian nappes	02-03	Fossen and Dunlap, 2006
5.4503	60.2056	Ar-Ar	White mica	410.4	0.6	Vaktdal Fm.	Caledonian nappes	01-03	Fossen and Dunlap, 2006
5.3378	61.9146	U-Pb	Zircon	1744	77	Western Gneiss Region	Caledonized basement	NW10-12	Gordon 2013
5.3456	62.0247	U-Pb	Zircon	1700	100	Western Gneiss Region	Caledonized basement	NW10-06	Gordon 2013
6.7246	62.7395	U-Pb	Zircon	1700	200	Western Gneiss Region	Caledonized basement	NW10-50	Gordon 2013
6.4891	62.7941	U-Pb	Zircon	403	3	Western Gneiss Region	Caledonized basement	NW10-56	Gordon 2013
5.6316	62.3764	U-Pb	Zircon	400	20	Western Gneiss Region	Caledonized basement	NW10-36D	Gordon 2013
6.4891	62.7941	U-Pb	Zircon	399	4	Western Gneiss Region	Caledonized basement	NW10-54	Gordon 2013
5.6316	62.3764	U-Pb	Zircon	398	6	Western Gneiss Region	Caledonized basement	NW10-36E	Gordon 2013
6.7246	62.7395	U-Pb	Zircon	398	14	Western Gneiss Region	Caledonized basement	NW10-45E	Gordon 2013
6.4891	62.7941	U-Pb	Zircon	397	6	Western Gneiss Region	Caledonized basement	NW10-55	Gordon 2013
6.4891	62.7941	U-Pb	Zircon	393	2	Western Gneiss Region	Caledonized basement	NW10-53B	Gordon 2013
9.9472	63.9145	U-Pb	Zircon	438.8	8.8	Seve Nappe Complex	Caledonian nappes	NW13-103b	Gordon 2016
9.9472	63.9145	U-Pb	Zircon	435.9	8.7	Seve Nappe Complex	Caledonian nappes	NW13-103a	Gordon 2016
10.1837	64.1558	U-Pb	Zircon	416	100	Northern Western Gneiss Region	Caledonized basement	NW13-100	Gordon 2016
10.1759	64.1448	U-Pb	Zircon	410.3	8.2	Northern Western Gneiss Region	Caledonized basement	NW13-97B	Gordon 2016
10.1759	64.1448	U-Pb	Zircon	410.3	8.2	Northern Western Gneiss Region	Caledonized basement	NW12-22C	Gordon 2016
10.1759	64.1448	U-Pb	Zircon	408.6	8.2	Northern Western Gneiss Region	Caledonized basement	NW12-22B	Gordon 2016
10.1759	64.1448	U-Pb	Zircon	407.3	8.1	Northern Western Gneiss Region	Caledonized basement	NW12-22D	Gordon 2016
10.1759	64.1448	U-Pb	Zircon	406.4	8.1	Northern Western Gneiss Region	Caledonized basement	NW13-97A	Gordon 2016
10.1759	64.1448	U-Pb	Zircon	405.3	8.1	Northern Western Gneiss Region	Caledonized basement	NW12-22I	Gordon 2016
10.1759	64.1448	U-Pb	Zircon	404.1	8.1	Northern Western Gneiss Region	Caledonized basement	NW12-22A	Gordon 2016
9.7391	63.6151	U-Pb	Zircon	403.8	8.1	Møre Trøndelag Fault Zone	Caledonized basement	NW13-105b	Gordon 2016
5.1489	61.2259	U-Pb	Monazite	457	2.5	Hyllestad	Caledonian nappes	W1	Hacker 2015
5.2093	61.222	U-Pb	Monazite	454	1.5	Hyllestad	Caledonian nappes	W2	Hacker 2015
5.3053	61.1638	U-Pb	Monazite	432	4.2	Hyllestad	Caledonian nappes	W5	Hacker 2015
11.2315	63.1544	U-Pb	Monazite	430	20	Gula	Caledonian nappes	E5	Hacker 2015
11.5898	63.4493	U-Pb	Monazite	430	3.3	Gula	Caledonian nappes	E6	Hacker 2015
9.9065	63.3284	U-Pb	Monazite	426	20	Gula	Caledonian nappes	E3	Hacker 2015
11.8907	63.6999	U-Pb	Monazite	426	3.4	Gula	Caledonian nappes	E7	Hacker 2015
5.3053	61.1638	U-Pb	Monazite	424	0.7	Hyllestad	Caledonian nappes	W4	Hacker 2015
5.3053	61.1638	U-Pb	Monazite	421	1.6	Hyllestad	Caledonian nappes	W3	Hacker 2015
8.917	62.1824	U-Pb	Monazite	420	12	Blåhø	Caledonian nappes	E1	Hacker 2015
11.2093	62.8685	U-Pb	Monazite	419	6.5	Gula	Caledonian nappes	E4	Hacker 2015
9.1499	62.9879	U-Pb	Monazite	410	1.1	Blåhø	Caledonian nappes	E2	Hacker 2015
8.917	62.1824	U-Pb	Monazite	405	4.2	Blåhø	Caledonian nappes	E1	Hacker 2015
7.0368	62.9648	U-Pb	Monazite	1700	100	Western Gneiss Region	Caledonized basement	B26	Hacker 2015
7.6648	62.4551	U-Pb	Monazite	1632	14	Western Gneiss Region	Caledonized basement	B22	Hacker 2015
7.7368	62.5329	U-Pb	Monazite	1611	7	Western Gneiss Region	Caledonized basement	B23	Hacker 2015
5.8397	62.0688	U-Pb	Monazite	1600	100	Western Gneiss Region	Caledonized basement	B4	Hacker 2015
6.7123	61.8846	U-Pb	Monazite	1600	100	Western Gneiss Region	Caledonized basement	B8	Hacker 2015
6.6817	62.1098	U-Pb	Monazite	1600	100	Western Gneiss Region	Caledonized basement	B12	Hacker 2015
5.1697	62.192	U-Pb	Monazite	1565	19	Western Gneiss Region	Caledonized basement	B3	Hacker 2015
7.6716	62.8658	U-Pb	Monazite	1200	100	Western Gneiss Region	Caledonized basement	B27	Hacker 2015
6.3809	62.7114	U-Pb	Monazite	1000	100	Western Gneiss Region	Caledonized basement	(H) B24	Hacker 2015
7.7368	62.5329	U-Pb	Monazite	970	12	Western Gneiss Region	Caledonized basement	B23	Hacker 2015
5.8397	62.0688	U-Pb	Monazite	968	7	Western Gneiss Region	Caledonized basement	B4	Hacker 2015
6.0769	62.1008	U-Pb	Monazite	962	13	Western Gneiss Region	Caledonized basement	B15	Hacker 2015
6.7123	61.8846	U-Pb	Monazite	960	100	Western Gneiss Region	Caledonized basement	B8	Hacker 2015
6.6817	62.1098	U-Pb	Monazite	954	5	Western Gneiss Region	Caledonized basement	B12	Hacker 2015
5.6288	62.4048	U-Pb	Monazite	950	14	Western Gneiss Region	Caledonized basement	B18	Hacker 2015
5.6578	62.4003	U-Pb	Monazite	930	100	Western Gneiss Region	Caledonized basement	B19	Hacker 2015
5.1697	62.192	U-Pb	Monazite	923	6	Western Gneiss Region	Caledonized basement	B3	Hacker 2015
6.9251	62.1572	U-Pb	Monazite	911	11	Western Gneiss Region	Caledonized basement	B11	Hacker 2015
7.6716	62.8658	U-Pb	Monazite	433	3	Western Gneiss Region	Caledonized basement	B27	Hacker 2015
6.3809	62.7114	U-Pb	Monazite	427	1.7	Western Gneiss Region	Caledonized basement	(H) B24	Hacker 2015
7.6716	62.8658	U-Pb	Monazite	426	0.9	Western Gneiss Region	Caledonized basement	B27	Hacker 2015
6.3809	62.7114	U-Pb	Monazite	424	3	Western Gneiss Region	Caledonized basement	(H) B24	Hacker 2015
5.9806	61.9993	U-Pb	Monazite	421	3	Western Gneiss Region	Caledonized basement	B6	Hacker 2015
7.6716	62.8658	U-Pb	Monazite	412	2.2	Western Gneiss Region	Caledonized basement	B27	Hacker 2015
7.6716	62.8658	U-Pb	Monazite	411	1.7	Western Gneiss Region	Caledonized basement	(H) B2	Hacker 2015
6.7721	62.2893	U-Pb	Monazite	403	3.4	Western Gneiss Region	Caledonized basement	B21	Hacker 2015
6.274	62.0664	U-Pb	Monazite	402	0.7	Western Gneiss Region	Caledonized basement	(H) B13	Hacker 2015
7.6648	62.4551	U-Pb	Monazite	400	100	Western Gneiss Region	Caledonized basement	B22	Hacker 2015
7.7368	62.5329	U-Pb	Monazite	399	3.4	Western Gneiss Region	Caledonized basement	B23	Hacker 2015
7.6716	62.8658	U-Pb	Monazite	398	1.1	Western Gneiss Region	Caledonized basement	(H) B2	Hacker 2015
5.2114	62.102	U-Pb	Monazite	397	1.7	Western Gneiss Region	Caledonized basement	B1	Hacker 2015
5.6288	62.4048	U-Pb	Monazite	397	3.2	Western Gneiss Region	Caledonized basement	B19	Hacker 2015
6.7721	62.2893	U-Pb	Monazite	396	3.4	Western Gneiss Region	Caledonized basement	B21	Hacker 2015
6.9235	62.1289	U-Pb	Monazite	394	0.9	Western Gneiss Region	Caledonized basement	B10	Hacker 2015
6.3809	62.7114	U-Pb	Monazite	393	3.3	Western Gneiss Region	Caledonized basement	(H) B24	Hacker 2015
7.0368	62.9648	U-Pb	Monazite	392	1.5	Western Gneiss Region	Caledonized basement	B26	Hacker 2015
5.2114	62.102	U-Pb	Monazite	391	3	Western Gneiss Region	Caledonized basement	B1	Hacker 2015
6.4187	62.0393	U-Pb	Monazite	391	1.5	Western Gneiss Region	Caledonized basement	B7	Hacker 2015
6.8821	62.098	U-Pb	Monazite	389	1.1	Western Gneiss Region	Caledonized basement	B9	Hacker 2015
5.6989	62.2964	U-Pb	Monazite	389	2	Western Gneiss Region	Caledonized basement	B17	Hacker 2015
5.9806	61.9993	U-Pb	Monazite	387	1.5	Western Gneiss Region	Caledonized basement	B6	Hacker 2015
5.9676	61.9916	U-Pb	Monazite	386	1.6	Western Gneiss Region	Caledonized basement	B5	Hacker 2015
6.1728	62.0812	U-Pb	Monazite	386	0.6	Western Gneiss Region	Caledonized basement	B14	Hacker 2015
6.4204	62.2907	U-Pb	Monazite	384	1.2	Western Gneiss Region	Caledonized basement	B20	Hacker 2015
6.0891	62.3419	U-Pb	Monazite	383	1.1	Western Gneiss Region	Caledonized basement	B16	Hacker 2015
7.0151	62.8546	U-Pb	Monazite	383	1.2	Western Gneiss Region	Caledonized basement	B25	Hacker 2015
5.6288	62.4048	U-Pb	Monazite	382	2.4	Western Gneiss Region	Caledonized basement	B18	Hacker 2015
5.6288	62.4048	U-Pb	Monazite	380	2.8	Western Gneiss Region	Caledonized basement	B19	Hacker 2015
5.8242	62.3418	U-Pb	Monazite	427	5.6	Western Gneiss Region	Caledonized basement cover	(H) M6	Hacker 2015
7.8003	61.9094	U-Pb	Monazite	420	20	Western Gneiss Region	Caledonized basement cover	(H) M28	Hacker 2015
5.6773	62.2948	U-Pb	Monazite	406	3.3	Western Gneiss Region	Caledonized basement cover	(H) M4	Hacker 2015
7.8003	61.9094	U-Pb	Monazite	401	2.7	Western Gneiss Region	Caledonized basement cover	(H) M28	Hacker 2015
6.3607	62.4445	U-Pb	Monazite	399	1.7	Western Gneiss Region	Caledonized basement cover	M10	Hacker 2015
7.8003	61.9094	U-Pb	Monazite	399	2.3	Western Gneiss Region	Caledonized basement cover	(H) M28	Hacker 2015
5.6773	62.2948	U-Pb	Monazite	398	2.7	Western Gneiss Region	Caledonized basement cover	(H) M4	Hacker 2015
7.3454	62.2915	U-Pb	Monazite	398	1.7	Western Gneiss Region	Caledonized basement cover	M23	Hacker 2015
7.2766	61.5586	U-Pb	Monazite	397	2.3	Western Gneiss Region	Caledonized basement cover	M21	Hacker 2015
6.6218	62.4885	U-Pb	Monazite	396	0.9	Western Gneiss Region	Caledonized basement cover	M11	Hacker 2015
7.8003	61.9094	U-Pb	Monazite	396	1.3	Western Gneiss Region	Caledonized basement cover	M27	Hacker 2015
8.5217	62.2549	U-Pb	Monazite	396	1.1	Western Gneiss Region	Caledonized basement cover	M29	Hacker 2015
8.8474	62.1992	U-Pb	Monazite	396	4.3	Western Gneiss Region	Caledonized basement cover	M30	Hacker 2015
5.8242	62.3418	U-Pb	Monazite	395	1.2	Western Gneiss Region	Caledonized basement cover	(H) M6	Hacker 2015
6.5227	62.6398	U-Pb	Monazite	395	0.8	Western Gneiss Region	Caledonized basement cover	M12	Hacker 2015
7.2077	62.452	U-Pb	Monazite	395	1.2	Western Gneiss Region	Caledonized basement cover	M18	Hacker 2015
7.2077	62.452	U-Pb	Monazite	394	1.3	Western Gneiss Region	Caledonized basement cover	M19	Hacker 2015
7.3035	62.2938	U-Pb	Monazite	394	1.3	Western Gneiss Region	Caledonized basement cover	M22	Hacker 2015
7.6073	62.0382	U-Pb	Monazite	394	1.4	Western Gneiss Region	Caledonized basement cover	M26	Hacker 2015
5.4143	62.2615	U-Pb	Monazite	393	1.1	Western Gneiss Region	Caledonized basement cover	M3	Hacker 2015
5.6773	62.2948	U-Pb	Monazite	393	0.6	Western Gneiss Region	Caledonized basement cover	(H) M4	Hacker 2015
7.4695	62.2061	U-Pb	Monazite	393	1.8	Western Gneiss Region	Caledonized basement cover	M24	Hacker 2015
5.4593	62.2133	U-Pb	Monazite	390	1.3	Western Gneiss Region	Caledonized basement cover	M2	Hacker 2015
5.5056	62.3603	U-Pb	Monazite	390	1.5	Western Gneiss Region	Caledonized basement cover	M5	Hacker 2015
5.8242	62.3418	U-Pb	Monazite	390	2.1	Western Gneiss Region	Caledonized basement cover	(H) M6	Hacker 2015
6.2067	62.4419	U-Pb	Monazite	390	0.9	Western Gneiss Region	Caledonized basement cover	M9	Hacker 2015
7.2701	62.7271	U-Pb	Monazite	389	1.3	Western Gneiss Region	Caledonized basement cover	M14	Hacker 2015
6.0177	62.1682	U-Pb	Monazite	388	3.2	Western Gneiss Region	Caledonized basement cover	M7	Hacker 2015
7.2077	62.452	U-Pb	Monazite	388	2.2	Western Gneiss Region	Caledonized basement cover	M20	Hacker 2015
7.5877	62.1766	U-Pb	Monazite	388	3.1	Western Gneiss Region	Caledonized basement cover	M25	Hacker 2015
5.6773	62.2948	U-Pb	Monazite	387	1.4	Western Gneiss Region	Caledonized basement cover	(H) M4	Hacker 2015
6.797	62.8097	U-Pb	Monazite	387	2.1	Western Gneiss Region	Caledonized basement cover	M13	Hacker 2015
7.6794	62.9616	U-Pb	Monazite	386	1.3	Western Gneiss Region	Caledonized basement cover	M15	Hacker 2015
6.945	62.4028	U-Pb	Monazite	386	2.1	Western Gneiss Region	Caledonized basement cover	M17	Hacker 2015
8.4084	62.9055	U-Pb	Monazite	385	4.9	Western Gneiss Region	Caledonized basement cover	M16	Hacker 2015
5.4593	62.2133	U-Pb	Monazite	383	1.1	Western Gneiss Region	Caledonized basement cover	M1	Hacker 2015
6.1735	62.6078	U-Pb	Monazite	382	1.2	Western Gneiss Region	Caledonized basement cover	M8	Hacker 2015
11.8581	63.0992	Ar-Ar	Hornblende	2162	6	Seve (Essandsjø)	Caledonian nappes	H1602E	Hacker and Gans, 2005
12.4235	63.1668	Ar-Ar	Hornblende	1165	5	Seve	Caledonian nappes	H1601B	Hacker and Gans, 2005
9.9065	63.3284	Ar-Ar	Hornblende	671	2	Seve (Blåhø)	Caledonian nappes	H1604J1	Hacker and Gans, 2005
9.6318	62.8944	Ar-Ar	Hornblende	616	2	Seve (Blåhø)	Caledonian nappes	H1603T3	Hacker and Gans, 2005
9.1499	62.9879	Ar-Ar	Hornblende	571	2	Seve (Blåhø)	Caledonian nappes	H1604E2	Hacker and Gans, 2005
12.4121	63.5456	Ar-Ar	Hornblende	529	2	Tännfors	Caledonian nappes	H1601C2	Hacker and Gans, 2005
11.4767	63.7231	Ar-Ar	Biotite	467	3	Seve (Skjøtingen)	Caledonian nappes	H1601E1	Hacker and Gans, 2005
11.7325	62.9815	Ar-Ar	Hornblende	444	4	Seve over Saetra	Caledonian nappes	H1602F2	Hacker and Gans, 2005
11.4655	63.0565	Ar-Ar	Hornblende	433	2	Fongen-Hyllingen	Caledonian nappes	H1602C	Hacker and Gans, 2005
11.5898	63.4493	Ar-Ar	Biotite	428	3	Gula	Caledonian nappes	H1531B1	Hacker and Gans, 2005
11.7325	62.9815	Ar-Ar	White mica	417	3	Seve over Saetra	Caledonian nappes	H1602F3	Hacker and Gans, 2005
11.2315	63.1544	Ar-Ar	White mica	415	3	Gula	Caledonian nappes	H1602A1	Hacker and Gans, 2005
11.2093	62.8685	Ar-Ar	White mica	415	1	Gula	Caledonian nappes	H1603N4	Hacker and Gans, 2005
11.9035	63.1191	Ar-Ar	White mica	414	3	Seve (Øyfell)	Caledonian nappes	H1602D1	Hacker and Gans, 2005
11.4767	63.7231	Ar-Ar	White mica	412	1	Seve (Skjøtingen)	Caledonian nappes	H1601E1	Hacker and Gans, 2005
9.9065	63.3284	Ar-Ar	White mica	405	1	Seve (Blåhø)	Caledonian nappes	H1604J3	Hacker and Gans, 2005
10.4529	63.0087	Ar-Ar	White mica	402	25	Gula	Caledonian nappes	H1603P1	Hacker and Gans, 2005
9.1499	62.9879	Ar-Ar	White mica	399	1	Seve (Blåhø)	Caledonian nappes	H1604E4	Hacker and Gans, 2005
9.7832	63.7679	Ar-Ar	Hornblende	406	5	Høybakken	Caledonized basement	H13Ahbl	Kendrick 2004
9.8297	63.6287	Ar-Ar	Hornblende	396	6	Møre Trøndelag Fault Zone	Caledonized basement	H-01	Kendrick 2004
9.8297	63.6287	Ar-Ar	Biotite	391	6	Møre Trøndelag Fault Zone	Caledonized basement	H-01	Kendrick 2004
9.8105	63.8998	Ar-Ar	Hornblende	386	4	Høybakken	Caledonized basement	H07	Kendrick 2004
9.7832	63.7679	Ar-Ar	White mica	386	6	Høybakken	Caledonized basement	H13-B	Kendrick 2004
9.8105	63.8998	Ar-Ar	Biotite	385	4	Høybakken	Caledonized basement	H07	Kendrick 2004
9.8004	63.9002	Ar-Ar	Biotite	384	6	Høybakken	Caledonized basement	H12	Kendrick 2004
9.8004	63.9002	Ar-Ar	White mica	382	6	Høybakken	Caledonized basement	H12	Kendrick 2004
9.8004	63.9002	Ar-Ar	Biotite	381	3	Høybakken	Caledonized basement	H08	Kendrick 2004
6.24072	62.6927	U-Pb	Zircon	396	4	Western Gneiss Region	Caledonized basement	C	Krogh 2011
6.17188	62.6552	U-Pb	Zircon	390	2	Western Gneiss Region	Caledonized basement	F	Krogh 2011
6.37789	62.7102	U-Pb	Zircon	395	2	Western Gneiss Region	Caledonized basement	G	Krogh 2011
7.37916	62.9748	U-Pb	Zircon	395.2	1.3	Western Gneiss Region	Caledonized basement	K	Krogh 2011
7.88344	62.99	U-Pb	Zircon	395.3	1.8	Western Gneiss Region	Caledonized basement	L	Krogh 2011
7.6563	62.4269	U-Pb	Zircon	1640	19	Western Gneiss Region	Caledonized basement	M8712B1	Kylander-Clark and Hacker 2014
5.2607	61.9857	U-Pb	Zircon	962	13	Western Gneiss Region	Caledonized basement	A0715M1	Kylander-Clark and Hacker 2014
8.0919	61.9169	U-Pb	Zircon	958	58	Western Gneiss Region	Caledonized basement	E1606O6	Kylander-Clark and Hacker 2014
6.9235	62.1289	U-Pb	Zircon	956	16	Western Gneiss Region	Caledonized basement	E9809C11	Kylander-Clark and Hacker 2014
7.201	62.2821	U-Pb	Zircon	940	100	Western Gneiss Region	Caledonized basement	E9805P8	Kylander-Clark and Hacker 2014
7.2632	61.9374	U-Pb	Zircon	924	17	Western Gneiss Region	Caledonized basement	E1608G10	Kylander-Clark and Hacker 2014
5.4059	62.13	U-Pb	Zircon	923	17	Western Gneiss Region	Caledonized basement	A0717B1	Kylander-Clark and Hacker 2014
6.9773	61.938	U-Pb	Zircon	923	18	Western Gneiss Region	Caledonized basement	E9816B7	Kylander-Clark and Hacker 2014
5.4082	62.0298	U-Pb	Zircon	900	100	Western Gneiss Region	Caledonized basement	A0715V1	Kylander-Clark and Hacker 2014
5.4271	62.2632	U-Pb	Zircon	407.6	4.8	Western Gneiss Region	Caledonized basement	R9828C99	Kylander-Clark and Hacker 2014
6.1001	62.5007	U-Pb	Zircon	404.5	5.5	Western Gneiss Region	Caledonized basement	A0722F1	Kylander-Clark and Hacker 2014
8.5164	62.6813	U-Pb	Zircon	403.5	1.4	Western Gneiss Region	Caledonized basement	K7710L2	Kylander-Clark and Hacker 2014
6.8821	62.098	U-Pb	Zircon	402.5	4.2	Western Gneiss Region	Caledonized basement	E1631A	Kylander-Clark and Hacker 2014
6.0181	62.1728	U-Pb	Zircon	402.3	2	Western Gneiss Region (Blahø nappe)	Caledonized basement	E1612B5	Kylander-Clark and Hacker 2014
5.7207	62.3154	U-Pb	Zircon	399.8	4.8	Western Gneiss Region	Caledonized basement	A0718F3	Kylander-Clark and Hacker 2014
5.5507	62.247	U-Pb	Zircon	399.4	4.3	Western Gneiss Region	Caledonized basement	8815G8	Kylander-Clark and Hacker 2014
6.2235	62.4699	U-Pb	Zircon	396.4	4.5	Western Gneiss Region	Caledonized basement	A0720M1	Kylander-Clark and Hacker 2014
5.7164	62.315	U-Pb	Zircon	395.9	4.5	Western Gneiss Region	Caledonized basement	A0718H1	Kylander-Clark and Hacker 2014
5.6989	62.2964	U-Pb	Zircon	395.2	4.3	Western Gneiss Region	Caledonized basement	P5701A	Kylander-Clark and Hacker 2014
6.1209	62.5874	U-Pb	Zircon	391.5	4.7	Western Gneiss Region	Caledonized basement	A0722G4	Kylander-Clark and Hacker 2014
5.0517	61.9426	U-Pb	Zircon	389.1	4.2	Western Gneiss Region	Caledonized basement	K7717K	Kylander-Clark and Hacker 2014
8.5461	63.144	Ar-Ar	Hornblende	403	9	Western Gneiss Region	Caledonized basement	Hbl‐8814A	Root 2005
7.883	62.9902	Ar-Ar	Hornblende	402	4	Western Gneiss Region	Caledonized basement	Hbl‐8814B	Root 2005
5.2029	61.9026	Ar-Ar	White mica	401	3	Western Gneiss Region	Caledonized basement	Ms‐R9901B1	Root 2005
8.5461	63.144	Ar-Ar	Biotite	397	4	Western Gneiss Region	Caledonized basement	Bt‐8814A	Root 2005
7.883	62.9902	Ar-Ar	Biotite	397	4	Western Gneiss Region	Caledonized basement	Bt‐8814B	Root 2005
6.082	62.583	Ar-Ar	Biotite	390	5	Western Gneiss Region	Caledonized basement	Bt‐8823B1	Root 2005
5.4766	62.2317	Ar-Ar	White mica	384	3	Western Gneiss Region	Caledonized basement	Ms‐8908B2	Root 2005
5.4566	62.2147	Ar-Ar	White mica	382	3	Western Gneiss Region	Caledonized basement	Ms‐8907C3	Root 2005
6.4264	62.7139	Ar-Ar	Biotite	380	4	Western Gneiss Region	Caledonized basement	Bt‐93FJ39	Root 2005
5.6738	62.3253	Ar-Ar	White mica	380	3	Western Gneiss Region	Caledonized basement	Ms‐8828A2	Root 2005
5.2429	62.1855	Ar-Ar	White mica	380	3	Western Gneiss Region	Caledonized basement	Ms‐8911B1	Root 2005
5.6302	62.3782	Ar-Ar	White mica	378	3	Western Gneiss Region	Caledonized basement	Ms‐8906A6	Root 2005
5.6735	62.3723	Ar-Ar	White mica	374	3	Western Gneiss Region	Caledonized basement	Ms‐8830B2	Root 2005
5.2001	62.102	Ar-Ar	White mica	369	3	Western Gneiss Region	Caledonized basement	Ms‐8913A1	Root 2005
4.9542	60.9753	U-Pb	Monazite	949	3	Western Gneiss Region	Caledonized basement	M	Røhr 2004
4.9542	60.9753	U-Pb	Zircon	987	10	Western Gneiss Region	Caledonized basement	Z	Røhr 2004
6.6015	61.2077	U-Pb	Titanite	971	5	Western Gneiss Region	Caledonized basement	5	Skar 2003
6.4475	61.1136	U-Pb	Titanite	966	10	Western Gneiss Region	Caledonized basement	4	Skar 2003
6.7181	61.1823	U-Pb	Titanite	964	4	Western Gneiss Region	Caledonized basement	5b	Skar 2003
6.541	61.1461	U-Pb	Titanite	958	3	Western Gneiss Region	Caledonized basement	3	Skar 2003
6.5422	61.1426	U-Pb	Titanite	951	3	Western Gneiss Region	Caledonized basement	6	Skar 2003
6.7181	61.1823	U-Pb	Zircon	969	12	Western Gneiss Region	Caledonized basement	2	Skar 2003
6.4466	61.1136	U-Pb	Zircon	969	8	Western Gneiss Region	Caledonized basement	4	Skar 2003
6.5878	61.5299	U-Pb	Zircon	966	2	Jølster granite, Western Gneiss Region	Caledonized basement	7	Skar 2003
5.4692	61.1363	U-Pb	Zircon	1621	3	Mølmesdal Gabbro complex, Western Gneiss Region	Caledonized basement?	1	Skar 2003
6.6015	61.8926	U-Pb	Titanite	983	49	Western Gneiss Region	Caledonized basement	Y1525A5	Spencer 2013
6.448	62.6077	U-Pb	Titanite	977	100	Western Gneiss Region	Caledonized basement	P6818A1	Spencer 2013
6.9604	61.8721	U-Pb	Titanite	966	25	Western Gneiss Region	Caledonized basement	E9810C1	Spencer 2013
5.7146	61.8811	U-Pb	Titanite	872	110	Western Gneiss Region	Caledonized basement	G9702F	Spencer 2013
6.374	61.6804	U-Pb	Titanite	854	100	Western Gneiss Region	Caledonized basement	Y0814E3	Spencer 2013
7.2632	61.9374	U-Pb	Titanite	753	100	Western Gneiss Region	Caledonized basement	E1608G11	Spencer 2013
6.9141	62.7479	U-Pb	Titanite	686	100	Western Gneiss Region	Caledonized basement	A0715C1	Spencer 2013
5.279	61.869	U-Pb	Titanite	426.7	5.5	Western Gneiss Region	Caledonized basement	G9702E1	Spencer 2013
7.4634	62.6847	U-Pb	Titanite	416.3	4.2	Western Gneiss Region	Caledonized basement	A0725K	Spencer 2013
7.7435	62.9683	U-Pb	Titanite	412.1	4.8	Western Gneiss Region	Caledonized basement	K1801F1	Spencer 2013
6.2766	62.4469	U-Pb	Titanite	408.4	1.6	Western Gneiss Region	Caledonized basement	K1729F5	Spencer 2013
7.3781	62.5783	U-Pb	Titanite	407.9	1.5	Western Gneiss Region	Caledonized basement	K1730G1	Spencer 2013
5.531	62.2584	U-Pb	Titanite	407.7	4.8	Western Gneiss Region	Caledonized basement	8815G4	Spencer 2013
6.9077	62.5885	U-Pb	Titanite	407.7	3.1	Western Gneiss Region	Caledonized basement	M8710F1	Spencer 2013
6.787	62.5808	U-Pb	Titanite	405.7	2.5	Western Gneiss Region	Caledonized basement	G9706V1	Spencer 2013
5.3093	61.9784	U-Pb	Titanite	405.5	7.5	Western Gneiss Region	Caledonized basement	A0715S	Spencer 2013
6.5809	62.5225	U-Pb	Titanite	405.3	1.7	Western Gneiss Region	Caledonized basement	A0801M	Spencer 2013
6.1209	62.5874	U-Pb	Titanite	404.9	2.4	Western Gneiss Region	Caledonized basement	A0722G3	Spencer 2013
6.8264	62.4801	U-Pb	Titanite	403.4	4	Western Gneiss Region	Caledonized basement	E9806G1	Spencer 2013
5.4063	62.0604	U-Pb	Titanite	403.4	6.1	Western Gneiss Region	Caledonized basement	K7718I1	Spencer 2013
6.3011	62.4905	U-Pb	Titanite	403.2	3.3	Western Gneiss Region	Caledonized basement	A0722B1	Spencer 2013
8.0449	62.3574	U-Pb	Titanite	403.1	1.6	Western Gneiss Region	Caledonized basement	E9803K2	Spencer 2013
5.989	62.4053	U-Pb	Titanite	403	6.2	Western Gneiss Region	Caledonized basement	8822A9	Spencer 2013
6.1996	62.4921	U-Pb	Titanite	403	3.1	Western Gneiss Region	Caledonized basement	A0722D1	Spencer 2013
6.6977	62.6672	U-Pb	Titanite	402.5	2.1	Western Gneiss Region	Caledonized basement	A0727H1	Spencer 2013
5.9703	62.2525	U-Pb	Titanite	402	3.3	Western Gneiss Region	Caledonized basement	P5627D1	Spencer 2013
6.945	62.4028	U-Pb	Titanite	401.8	1.7	Western Gneiss Region	Caledonized basement	E9806B2	Spencer 2013
6.5301	62.4995	U-Pb	Titanite	400.8	2.9	Western Gneiss Region	Caledonized basement	G9704G1	Spencer 2013
6.4353	62.5323	U-Pb	Titanite	400.7	4.8	Western Gneiss Region	Caledonized basement	A0723D1	Spencer 2013
5.4719	62.1914	U-Pb	Titanite	400	4.5	Western Gneiss Region	Caledonized basement	P5630G2	Spencer 2013
6.8738	62.694	U-Pb	Titanite	399.5	4.2	Western Gneiss Region	Caledonized basement	A0727N1	Spencer 2013
6.2504	62.5689	U-Pb	Titanite	399.5	8	Western Gneiss Region	Caledonized basement	M8710A1	Spencer 2013
6.782	62.8064	U-Pb	Titanite	399.4	2.9	Western Gneiss Region	Caledonized basement	A0725J4	Spencer 2013
6.7923	62.0783	U-Pb	Titanite	399.2	1.7	Western Gneiss Region	Caledonized basement	K1725C	Spencer 2013
7.1293	62.5369	U-Pb	Titanite	399.1	1.7	Western Gneiss Region	Caledonized basement	P6826I1	Spencer 2013
6.0985	62.1186	U-Pb	Titanite	398.8	3.9	Western Gneiss Region	Caledonized basement	P5628E5	Spencer 2013
5.1416	61.9603	U-Pb	Titanite	398.8	2.5	Western Gneiss Region	Caledonized basement	P6824F1	Spencer 2013
5.9895	62.2133	U-Pb	Titanite	398.2	2	Western Gneiss Region	Caledonized basement	K1728B	Spencer 2013
6.9865	62.7795	U-Pb	Titanite	398.1	3.6	Western Gneiss Region	Caledonized basement	K1802H	Spencer 2013
5.1589	62.1291	U-Pb	Titanite	398	5.4	Western Gneiss Region	Caledonized basement	8912C3	Spencer 2013
7.7908	62.9738	U-Pb	Titanite	398	2.2	Western Gneiss Region	Caledonized basement	M8711C1	Spencer 2013
6.1875	62.6312	U-Pb	Titanite	397.9	1.8	Western Gneiss Region	Caledonized basement	A0721G1	Spencer 2013
6.0972	62.5063	U-Pb	Titanite	397.7	3.1	Western Gneiss Region	Caledonized basement	G9705R1	Spencer 2013
6.6373	62.6566	U-Pb	Titanite	397.1	2.4	Western Gneiss Region	Caledonized basement	A0727C1	Spencer 2013
5.961	62.4825	U-Pb	Titanite	397	1.7	Western Gneiss Region	Caledonized basement	K1729A1	Spencer 2013
5.5518	62.1724	U-Pb	Titanite	396.8	3.6	Western Gneiss Region	Caledonized basement	P6815G1	Spencer 2013
6.4056	62.3064	U-Pb	Titanite	396.7	3	Western Gneiss Region	Caledonized basement	E9814B2	Spencer 2013
5.6336	62.1913	U-Pb	Titanite	396.3	3.5	Western Gneiss Region	Caledonized basement	A0717M3	Spencer 2013
5.7912	62.303	U-Pb	Titanite	396.3	4.6	Western Gneiss Region	Caledonized basement	A0719H1	Spencer 2013
5.6037	62.2966	U-Pb	Titanite	396.2	2.3	Western Gneiss Region	Caledonized basement	A0718C1	Spencer 2013
5.2979	61.9866	U-Pb	Titanite	396	17	Western Gneiss Region	Caledonized basement	A0715R1	Spencer 2013
6.1226	62.4719	U-Pb	Titanite	396	2.8	Western Gneiss Region	Caledonized basement	A0720P1	Spencer 2013
6.2378	62.6927	U-Pb	Titanite	396	15	Western Gneiss Region	Caledonized basement	A0721E5	Spencer 2013
6.5168	62.6406	U-Pb	Titanite	396	2.7	Western Gneiss Region	Caledonized basement	G9707A1	Spencer 2013
5.8421	62.3953	U-Pb	Titanite	395.9	1.4	Western Gneiss Region	Caledonized basement	A0805C1	Spencer 2013
6.1209	62.5874	U-Pb	Titanite	395.5	3.3	Western Gneiss Region	Caledonized basement	A0722G5	Spencer 2013
6.6185	62.5671	U-Pb	Titanite	395.4	2.5	Western Gneiss Region	Caledonized basement	A0723A1	Spencer 2013
5.6978	62.1997	U-Pb	Titanite	395.3	1.7	Western Gneiss Region	Caledonized basement	A0717J1	Spencer 2013
6.0406	62.2008	U-Pb	Titanite	395.3	6.8	Western Gneiss Region	Caledonized basement	P5710A5	Spencer 2013
6.1149	61.8218	U-Pb	Titanite	395	14	Western Gneiss Region	Caledonized basement	Y0829J2	Spencer 2013
5.8492	62.0207	U-Pb	Titanite	394.8	2.3	Western Gneiss Region	Caledonized basement	P5628U	Spencer 2013
6.2417	62.571	U-Pb	Titanite	394.7	4.3	Western Gneiss Region	Caledonized basement	A0721A1	Spencer 2013
6.909	62.5614	U-Pb	Titanite	394	2.4	Western Gneiss Region	Caledonized basement	K1730C1	Spencer 2013
6.5033	62.4324	U-Pb	Titanite	393.9	2.3	Western Gneiss Region	Caledonized basement	A0720J2	Spencer 2013
5.1834	62.119	U-Pb	Titanite	393.5	9.4	Western Gneiss Region	Caledonized basement	P6807A2	Spencer 2013
6.4501	62.5704	U-Pb	Titanite	393.4	2.7	Western Gneiss Region	Caledonized basement	G9706N1	Spencer 2013
6.2848	62.0718	U-Pb	Titanite	392.8	2.1	Western Gneiss Region	Caledonized basement	P6821A1	Spencer 2013
5.7207	62.3154	U-Pb	Titanite	392.7	2.3	Western Gneiss Region	Caledonized basement	A0718F1	Spencer 2013
7.2619	62.2386	U-Pb	Titanite	392.6	5.5	Western Gneiss Region	Caledonized basement	E9808H	Spencer 2013
6.0841	62.5878	U-Pb	Titanite	392.4	4.8	Western Gneiss Region	Caledonized basement	A0722H1	Spencer 2013
5.0755	61.9119	U-Pb	Titanite	391.9	4.7	Western Gneiss Region	Caledonized basement	A0714L1	Spencer 2013
6.3774	62.5345	U-Pb	Titanite	391.7	2.2	Western Gneiss Region	Caledonized basement	G9705Y1	Spencer 2013
5.4072	62.2445	U-Pb	Titanite	390.8	2.9	Western Gneiss Region	Caledonized basement	R9829C3	Spencer 2013
5.5056	62.3603	U-Pb	Titanite	390.6	2.5	Western Gneiss Region	Caledonized basement	8830A11	Spencer 2013
6.5336	61.9722	U-Pb	Titanite	390.3	5.7	Western Gneiss Region	Caledonized basement	J5810D	Spencer 2013
6.4038	62.0417	U-Pb	Titanite	390.1	2.8	Western Gneiss Region	Caledonized basement	P5624I9	Spencer 2013
5.7183	62.3218	U-Pb	Titanite	390.1	2.5	Western Gneiss Region	Caledonized basement	R3704A6	Spencer 2013
6.6722	62.6911	U-Pb	Titanite	390	12	Western Gneiss Region	Caledonized basement	G9707N1	Spencer 2013
5.5518	62.1724	U-Pb	Titanite	389.6	1.6	Western Gneiss Region	Caledonized basement	P6815G1	Spencer 2013
7.4285	62.2531	U-Pb	Titanite	389.2	4.1	Western Gneiss Region	Caledonized basement	E9805K	Spencer 2013
5.6364	62.1712	U-Pb	Titanite	389	1.9	Western Gneiss Region	Caledonized basement	P6815F2	Spencer 2013
5.5392	62.1764	U-Pb	Titanite	389	4.6	Western Gneiss Region	Caledonized basement	P6815H1	Spencer 2013
6.0972	62.5063	U-Pb	Titanite	388.9	1.6	Western Gneiss Region	Caledonized basement	G9705R2	Spencer 2013
5.8242	62.3418	U-Pb	Titanite	388.8	3.1	Western Gneiss Region	Caledonized basement	R9823A1	Spencer 2013
5.8176	62.2777	U-Pb	Titanite	388.8	2.4	Western Gneiss Region	Caledonized basement	R1617B1	Spencer 2013
5.9458	62.2173	U-Pb	Titanite	388.7	6.6	Western Gneiss Region	Caledonized basement	E1612D1	Spencer 2013
5.4834	62.2571	U-Pb	Titanite	388.6	2.2	Western Gneiss Region	Caledonized basement	R9828B2	Spencer 2013
7.2125	62.2499	U-Pb	Titanite	388.5	5.3	Western Gneiss Region	Caledonized basement	E9808I	Spencer 2013
5.6116	62.2955	U-Pb	Titanite	388.4	2.6	Western Gneiss Region	Caledonized basement	A0718D	Spencer 2013
7.5067	62.5345	U-Pb	Titanite	388.4	2.5	Western Gneiss Region	Caledonized basement	K1730H1	Spencer 2013
5.9521	62.2015	U-Pb	Titanite	388.1	2.6	Western Gneiss Region	Caledonized basement	P5626N	Spencer 2013
5.5793	62.1951	U-Pb	Titanite	387.9	3	Western Gneiss Region	Caledonized basement	A0717P1	Spencer 2013
5.4143	62.2615	U-Pb	Titanite	387.9	3.1	Western Gneiss Region	Caledonized basement	R9828C8	Spencer 2013
6.321	62.3743	U-Pb	Titanite	387.5	2.6	Western Gneiss Region	Caledonized basement	P5627K4	Spencer 2013
5.0517	61.9426	U-Pb	Titanite	387.1	4.5	Western Gneiss Region	Caledonized basement	K7717K	Spencer 2013
6.495	62.5395	U-Pb	Titanite	387	3	Western Gneiss Region	Caledonized basement	R9821D2	Spencer 2013
5.6578	62.4003	U-Pb	Titanite	386.3	2.8	Western Gneiss Region	Caledonized basement	R9824B4	Spencer 2013
7.0653	62.8174	U-Pb	Titanite	386.2	2.5	Western Gneiss Region	Caledonized basement	K1802J	Spencer 2013
6.4712	62.7845	U-Pb	Titanite	386.1	2.7	Western Gneiss Region	Caledonized basement	G9709K1	Spencer 2013
5.5919	62.4059	U-Pb	Titanite	385.7	4.7	Western Gneiss Region	Caledonized basement	8829A2	Spencer 2013
6.4163	62.1945	U-Pb	Titanite	385.6	3.3	Western Gneiss Region	Caledonized basement	K1803C1	Spencer 2013
5.2999	61.9621	U-Pb	Titanite	385.5	7.6	Western Gneiss Region	Caledonized basement	A0715M2	Spencer 2013
6.2333	62.4014	U-Pb	Titanite	385.5	1.6	Western Gneiss Region	Caledonized basement	K5702D2	Spencer 2013
6.7241	62.6444	U-Pb	Titanite	385.3	2.5	Western Gneiss Region	Caledonized basement	M8710E1	Spencer 2013
5.2711	62.1733	U-Pb	Titanite	385	10	Western Gneiss Region	Caledonized basement	8911A5	Spencer 2013
6.0415	62.5109	U-Pb	Titanite	384.7	3.2	Western Gneiss Region	Caledonized basement	A0722E1	Spencer 2013
6.0145	62.2227	U-Pb	Titanite	384.6	5	Western Gneiss Region	Caledonized basement	E1612I2	Spencer 2013
6.6653	62.69	U-Pb	Titanite	384.5	7.3	Western Gneiss Region	Caledonized basement	A0724H	Spencer 2013
6.0538	62.5686	U-Pb	Titanite	384.3	2	Western Gneiss Region	Caledonized basement	A0722J1	Spencer 2013
5.9826	61.9965	U-Pb	Titanite	384.3	8	Western Gneiss Region	Caledonized basement	K1727C1	Spencer 2013
5.1768	62.1032	U-Pb	Titanite	384.3	5.9	Western Gneiss Region	Caledonized basement	P6807C2	Spencer 2013
5.5392	62.1764	U-Pb	Titanite	384.2	8.1	Western Gneiss Region	Caledonized basement	P6815H1	Spencer 2013
5.4593	62.2133	U-Pb	Titanite	383.7	3.1	Western Gneiss Region	Caledonized basement	8907C6	Spencer 2013
6.6817	62.1098	U-Pb	Titanite	381.9	3.2	Western Gneiss Region	Caledonized basement	K1725B3	Spencer 2013
5.5213	62.3582	U-Pb	Titanite	381.9	1.9	Western Gneiss Region	Caledonized basement	R9825E1	Spencer 2013
5.19	62.1986	U-Pb	Titanite	381.4	5.6	Western Gneiss Region	Caledonized basement	P6806B1	Spencer 2013
6.7721	62.8068	U-Pb	Titanite	381.3	7.2	Western Gneiss Region	Caledonized basement	G9708Q4	Spencer 2013
6.6754	62.7187	U-Pb	Titanite	380	2	Western Gneiss Region	Caledonized basement	G9707R2	Spencer 2013
5.9867	62.2155	U-Pb	Titanite	380	5.4	Western Gneiss Region	Caledonized basement	P5626P1	Spencer 2013
5.1768	62.1032	U-Pb	Titanite	379	10	Western Gneiss Region	Caledonized basement	P6807D	Spencer 2013
5.4143	62.2615	U-Pb	Titanite	378.9	4.4	Western Gneiss Region	Caledonized basement	R9828C11	Spencer 2013
6.2378	62.6927	U-Pb	Titanite	378	2.5	Western Gneiss Region	Caledonized basement	A0721E2	Spencer 2013
6.2378	62.6927	U-Pb	Titanite	377.5	2.5	Western Gneiss Region	Caledonized basement	A0721E4	Spencer 2013
4.96894	60.5791	Ar-Ar	Biotite	457	2	Lindås Nappe	Caledonian nappes	N1b	This study
4.96894	60.5791	Ar-Ar	White mica	432	2	Lindås Nappe	Caledonian nappes	N1m	This study
5.31733	60.3876	Ar-Ar	White mica	408	3	Minor Bergen Arc	Caledonian nappes	N2m	This study
4.80242	60.9339	Ar-Ar	White mica	424	7	Western Gneiss Region	Caledonized basement	G1m	This study
4.80242	60.9339	Ar-Ar	Biotite	418	3	Western Gneiss Region	Caledonized basement	G1b	This study
5.23206	60.8865	Ar-Ar	Biotite	418	2	Western Gneiss Region	Caledonized basement	G6b	This study
5.2388	60.362	Ar-Ar	Biotite	412.2	1.4	Øygarden Complex	Caledonized basement	O2b	This study
4.80094	60.6088	Ar-Ar	Biotite	411	2	Øygarden Complex	Caledonized basement	O6b	This study
5.04107	60.1355	Ar-Ar	Biotite	410	3	Øygarden Complex	Caledonized basement	O1b	This study
5.06972	60.8621	Ar-Ar	White mica	410	1	Western Gneiss Region	Caledonized basement	G2m	This study
4.96286	60.9101	Ar-Ar	Biotite	406	2	Western Gneiss Region	Caledonized basement	G5b	This study
4.86351	60.9861	Ar-Ar	White mica	405	4	Western Gneiss Region	Caledonized basement	G3m	This study
5.2421	60.3717	Ar-Ar	White mica	404.7	0.7	Øygarden Complex	Caledonized basement	O3m	This study
5.03972	60.3876	Ar-Ar	Biotite	404	2	Øygarden Complex	Caledonized basement	O10b	This study
5.15242	60.1847	Ar-Ar	Biotite	403	3	Øygarden Complex	Caledonized basement	O4b	This study
4.80094	60.6088	Ar-Ar	White mica	403	1	Øygarden Complex	Caledonized basement	O6m	This study
5.11168	60.1914	Ar-Ar	Biotite	402	2	Øygarden Complex	Caledonized basement	O8b	This study
5.16223	61.0789	Ar-Ar	White mica	402	1	Western Gneiss Region	Caledonized basement	G4m	This study
4.96286	60.9101	Ar-Ar	White mica	402	2	Western Gneiss Region	Caledonized basement	G5m	This study
4.69902	60.7693	Ar-Ar	White mica	401	5	Øygarden Complex	Caledonized basement	O7m	This study
5.11168	60.1914	Ar-Ar	White mica	401	2	Øygarden Complex	Caledonized basement	O8m	This study
5.15242	60.1847	Ar-Ar	White mica	400	2	Øygarden Complex	Caledonized basement	O4m	This study
4.86351	60.9861	Ar-Ar	Biotite	400	3	Western Gneiss Region	Caledonized basement	G3b	This study
5.23206	60.8865	Ar-Ar	White mica	400	3	Western Gneiss Region	Caledonized basement	G6m	This study
5.20064	60.4714	Ar-Ar	Biotite	399	5	Øygarden Complex	Caledonized basement	O5b	This study
4.89037	60.5349	Ar-Ar	White mica	399	2	Øygarden Complex	Caledonized basement	O9m	This study
5.20064	60.4714	Ar-Ar	White mica	397	3	Øygarden Complex	Caledonized basement	O5m	This study
5.55587	60.9608	Ar-Ar	White mica	393	2	Western Gneiss Region	Caledonized basement	G7m	This study
5.01755	60.3933	U-Pb	Zircon	404.8	5.1	Øygarden Complex	Caledonized basement	OC-08	This study
5.03972	60.3876	U-Pb	Zircon	404.8	5.2	Øygarden Complex	Caledonized basement	OC-02	This study
5.00624	60.3338	U-Pb	Zircon	399.2	3.8	Øygarden Complex	Caledonized basement	OC-09	This study
8.9869	61.9225	Ar-Ar	White mica	423.6	3.3	Upper Allochthon	Caledonian nappes	e1627i	Walsh 2007
9.607	62.3073	Ar-Ar	White mica	410.5	3.4	Upper Allochthon	Caledonian nappes	e9730g1	Walsh 2007
8.8474	62.1992	Ar-Ar	White mica	399.1	3.1	Upper Allochthon	Caledonian nappes	e9731d2	Walsh 2007
7.6909	62.007	Ar-Ar	White mica	395.2	3.1	Middle Allochthon	Caledonian nappes	e9816e	Walsh 2007
7.5838	62.1775	Ar-Ar	White mica	394.3	3.1	Upper Allochthon	Caledonian nappes	e1704c	Walsh 2007
7.8289	61.8947	Ar-Ar	White mica	392.9	3.1	Middle Allochthon	Caledonian nappes	e9818b	Walsh 2007
7.3035	62.2938	Ar-Ar	White mica	391.2	3	Middle Allochthon	Caledonian nappes	e9804j1	Walsh 2007
6.4628	61.8047	Ar-Ar	White mica	399.4	3.4	Western Gneiss Region	Caledonized basement	e9810e	Walsh 2007
7.6648	62.4551	Ar-Ar	White mica	391.5	3.1	Western Gneiss Region	Caledonized basement	e9804c7	Walsh 2007
6.568	61.997	Ar-Ar	White mica	390.3	3	Western Gneiss Region	Caledonized basement	e9809g3	Walsh 2007
6.9235	62.1289	Ar-Ar	White mica	389.78	3	Western Gneiss Region	Caledonized basement	e9809c	Walsh 2007
8.3907	61.179	Ar-Ar	White mica	902.5	0.9		Caledonian nappes	H5621A	Walsh 2013
9.699	63.3757	Ar-Ar	White mica	402.4	1		Caledonian nappes	J5816K	Walsh 2013
7.7777	61.6372	Ar-Ar	White mica	510.8		Western Gneiss Region	Caledonized basement	P6804A	Walsh 2013
5.4197	61.3349	Ar-Ar	White mica	404.1		Western Gneiss Region	Caledonized basement	K5622A5	Walsh 2013
8.5517	62.5145	Ar-Ar	White mica	398.5	1.1	Western Gneiss Region	Caledonized basement	J5814H	Walsh 2013
5.7511	61.1675	Ar-Ar	White mica	397.5	1.1	Western Gneiss Region	Caledonized basement	H5622B	Walsh 2013
6.1148	61.871	Ar-Ar	White mica	397.2	0.9	Western Gneiss Region	Caledonized basement	H5622E	Walsh 2013
9.13	62.9354	Ar-Ar	White mica	397.1	0.9	Western Gneiss Region	Caledonized basement	J5816L1	Walsh 2013
6.2069	61.1672	Ar-Ar	White mica	394.7	0.5	Western Gneiss Region	Caledonized basement	H5622C	Walsh 2013
5.7398	60.681	Ar-Ar	White mica	393.7	2	Western Gneiss Region	Caledonized basement	H5621B	Walsh 2013
6.824	62.0755	Ar-Ar	White mica	389.7	1.1	Western Gneiss Region	Caledonized basement	E1612Q8	Walsh 2013
9.056	63.1609	Ar-Ar	White mica	389.6	0.9	Western Gneiss Region	Caledonized basement	J5816J	Walsh 2013
6.4204	62.2907	Ar-Ar	White mica	389.3	0.9	Western Gneiss Region	Caledonized basement	E9814A6	Walsh 2013
8.0514	62.6594	Ar-Ar	White mica	389.3	0.9	Western Gneiss Region	Caledonized basement	J5813F	Walsh 2013
6.0413	62.4837	Ar-Ar	White mica	388.8	0.9	Western Gneiss Region	Caledonized basement	H5702A	Walsh 2013
7.4421	62.6882	Ar-Ar	White mica	388.6	0.9	Western Gneiss Region	Caledonized basement	J5814S	Walsh 2013
7.1114	61.9073	Ar-Ar	White mica	388.2	0.9	Western Gneiss Region	Caledonized basement	J5811D	Walsh 2013
5.4945	61.9601	Ar-Ar	White mica	388.2	0.9	Western Gneiss Region	Caledonized basement	P6805H2	Walsh 2013
8.0904	62.875	Ar-Ar	White mica	388.1	1	Western Gneiss Region	Caledonized basement	J5814N4	Walsh 2013
5.6628	62.0374	Ar-Ar	White mica	387.4	0.9	Western Gneiss Region	Caledonized basement	P5629O	Walsh 2013
5.9764	62.1933	Ar-Ar	White mica	387.1	0.9	Western Gneiss Region	Caledonized basement	E1612C7	Walsh 2013
8.5168	63.1667	Ar-Ar	White mica	386.6	2.3	Western Gneiss Region	Caledonized basement	J5816A	Walsh 2013
6.0973	62.3063	Ar-Ar	White mica	385.8	0.8	Western Gneiss Region	Caledonized basement	P5627F3	Walsh 2013
6.321	62.3743	Ar-Ar	White mica	385.3	1.7	Western Gneiss Region	Caledonized basement	P5627K	Walsh 2013
8.9969	63.3396	Ar-Ar	White mica	384.8	2.2	Western Gneiss Region	Caledonized basement	J5816I	Walsh 2013
8.2832	63.2453	Ar-Ar	White mica	384.2	1.1	Western Gneiss Region	Caledonized basement	J5815K	Walsh 2013
5.6873	62.2981	Ar-Ar	White mica	384.2	1	Western Gneiss Region	Caledonized basement	P6816B1	Walsh 2013
6.1681	62.2639	Ar-Ar	White mica	383.7	1.2	Western Gneiss Region	Caledonized basement	P5627E2	Walsh 2013
6.6749	62.674	Ar-Ar	White mica	383.7	1.2	Western Gneiss Region	Caledonized basement	P6818C2	Walsh 2013
8.6845	63.3496	Ar-Ar	White mica	382.7	1.8	Western Gneiss Region	Caledonized basement	J5816B	Walsh 2013
5.558	62.2896	Ar-Ar	White mica	382.4	1	Western Gneiss Region	Caledonized basement	8907B5	Walsh 2013
5.531	62.2584	Ar-Ar	White mica	381.7	0.9	Western Gneiss Region	Caledonized basement	8815G12	Walsh 2013
5.1594	62.1283	Ar-Ar	White mica	379.8	1	Western Gneiss Region	Caledonized basement	P6806J	Walsh 2013
7.0213	62.9467	Ar-Ar	White mica	379.7	1	Western Gneiss Region	Caledonized basement	J5815G	Walsh 2013
6.8004	62.8141	Ar-Ar	White mica	377.5	0.8	Western Gneiss Region	Caledonized basement	J5815B1	Walsh 2013
7.0151	62.8546	Ar-Ar	White mica	375.6	1.2	Western Gneiss Region	Caledonized basement	J5815E1	Walsh 2013
6.1003	61.8371	Ar-Ar	Hornblende	780	6	Middle Allochthon	Caledonian nappes	1520G2 HBL	Young 2011
6.2279	61.7751	Ar-Ar	White mica	402	3	Lower Allochthon	Caledonian nappes	1701A1 WM	Young 2011
6.4939	61.8389	Ar-Ar	White mica	399	3	Lower Allochthon	Caledonian nappes	0824Q WM	Young 2011
6.0942	61.8395	Ar-Ar	White mica	398	3	Middle Allochthon	Caledonian nappes	1704B WM	Young 2011
6.5162	61.7648	Ar-Ar	White mica	396	3	Lower Allochthon	Caledonian nappes	0821E WM	Young 2011
6.6229	61.8942	Ar-Ar	Hornblende	515	4	Western Gneiss Region	Caledonized basement	1630B HBL	Young 2011
6.3061	61.7468	Ar-Ar	Hornblende	481	4	Western Gneiss Region	Caledonized basement	0815F HBL	Young 2011
6.5758	61.886	Ar-Ar	Hornblende	421	3	Western Gneiss Region	Caledonized basement	1530B2 HBL	Young 2011
5.9236	61.9008	Ar-Ar	Hornblende	418	3	Western Gneiss Region	Caledonized basement	1607E HBL	Young 2011
6.1321	61.9663	Ar-Ar	Hornblende	397	4	Western Gneiss Region	Caledonized basement	1611H HBL	Young 2011
6.5338	61.8611	Ar-Ar	White mica	395	3	Western Gneiss Region	Caledonized basement	1630A WM	Young 2011
6.296	61.7506	Ar-Ar	White mica	394	8	Western Gneiss Region	Caledonized basement	0815G WM	Young 2011
6.1025	61.9848	Ar-Ar	White mica	390	3	Western Gneiss Region	Caledonized basement	1611L3 WM	Young 2011
6.0994	61.9302	Ar-Ar	White mica	380	3	Western Gneiss Region	Caledonized basement	1611B1A WM	Young 2011
6.1304	61.8166	U-Pb	Zircon	429	4	Western Gneiss Region	Caledonian nappes	PE3	Young 2015
6.3601	61.9291	U-Pb	Zircon	976	9	Western Gneiss Region	Caledonized basement	GD1	Young 2015
6.2043	61.7864	U-Pb	Zircon	420	30	Western Gneiss Region	Caledonized basement	GDS	Young 2015
6.3661	62.0065	U-Pb	Zircon	417	7	Western Gneiss Region	Caledonized basement	PA1	Young 2015
6.1025	61.9848	U-Pb	Zircon	417	4	Western Gneiss Region	Caledonized basement	PA2	Young 2015
6.1369	61.9454	U-Pb	Zircon	414	6	Western Gneiss Region	Caledonized basement	GA3	Young 2015
6.2473	61.9539	U-Pb	Zircon	413	4	Western Gneiss Region	Caledonized basement	PE2	Young 2015
5.5151	61.9265	U-Pb	Zircon	412	4	Western Gneiss Region	Caledonized basement	PE1	Young 2015
6.108	61.9802	U-Pb	Zircon	410	3	Western Gneiss Region	Caledonized basement	GD2	Young 2015
6.1025	61.9848	U-Pb	Zircon	407	5	Western Gneiss Region	Caledonized basement	GA2	Young 2015

## Sheet: Table sorted for plots
Long	Lat	System	Mineral	Age	Error	Unit	Megaunit	Sample	Reference	Comment
11.8581	63.0992	Ar-Ar	Hornblende	2162	6	Seve (Essandsjø)	Caledonian nappes	H1602E	Hacker and Gans, 2005
6.1786	60.64	Ar-Ar	Hornblende	1279	10	Lower Bergsdalen Nappe	Caledonian nappes	H8A	Fossen and Dunlap, 1998
12.4235	63.1668	Ar-Ar	Hornblende	1165	5	Seve	Caledonian nappes	H1601B	Hacker and Gans, 2005
6.5881	60.9848	Ar-Ar	Hornblende	912	4	Jotun Nappe	Caledonian nappes	H31	Fossen and Dunlap, 1998
8.3907	61.179	Ar-Ar	White mica	902.5	0.9		Caledonian nappes	H5621A	Walsh 2013
6.1003	61.8371	Ar-Ar	Hornblende	780	6	Middle Allochthon	Caledonian nappes	1520G2 HBL	Young 2011
5.392	60.2912	Ar-Ar	Hornblende	723	5	Lindås Nappe	Caledonian nappes	H36	Fossen and Dunlap, 1998
9.9065	63.3284	Ar-Ar	Hornblende	671	2	Seve (Blåhø)	Caledonian nappes	H1604J1	Hacker and Gans, 2005
9.6318	62.8944	Ar-Ar	Hornblende	616	2	Seve (Blåhø)	Caledonian nappes	H1603T3	Hacker and Gans, 2005
9.1499	62.9879	Ar-Ar	Hornblende	571	2	Seve (Blåhø)	Caledonian nappes	H1604E2	Hacker and Gans, 2005
12.4121	63.5456	Ar-Ar	Hornblende	529	2	Tännfors	Caledonian nappes	H1601C2	Hacker and Gans, 2005
11.4229	63.7979	Ar-Ar	Hornblende	477	3	Seve nappe	Caledonian nappes	4A	Dallmeyer 1990
11.4767	63.7231	Ar-Ar	Biotite	467	3	Seve (Skjøtingen)	Caledonian nappes	H1601E1	Hacker and Gans, 2005
5.0867	60.5624	Ar-Ar	White mica	462.6	0.8	Lindås Nappe	Caledonian nappes	BA22/89	Boundy, 1996
4.96894	60.5791	Ar-Ar	Biotite	457	2	Lindås Nappe	Caledonian nappes	N1b	This study
4.979	60.7833	Ar-Ar	Hornblende	455.4	1.5	Lindås Nappe	Caledonian nappes	BA48/92	Boundy, 1996
5.0489	60.552	Ar-Ar	White mica	451.3	1.1	Lindås Nappe	Caledonian nappes	BA31/92	Boundy, 1996
5.0305	60.5718	Ar-Ar	Hornblende	447.7	4.2	Lindås Nappe	Caledonian nappes	BA1/92	Boundy, 1996
4.9061	61.3379	Ar-Ar	White mica	446	4	Dalsfjord Suite–Høyvik Group	Caledonian nappes	ATL-34	Andersen 1998
4.9988	61.3782	Ar-Ar	White mica	444	4	Dalsfjord Suite–Høyvik Group	Caledonian nappes	ATL-35	Andersen 1998
11.7325	62.9815	Ar-Ar	Hornblende	444	4	Seve over Saetra	Caledonian nappes	H1602F2	Hacker and Gans, 2005
5.3326	61.4592	Ar-Ar	White mica	440	4	Dalsfjord Suite–Høyvik Group	Caledonian nappes	KVA-57	Andersen 1998
12.4077	64.3495	Ar-Ar	Hornblende	440	2	Møre Trøndelag Fault Zone	Caledonian nappes	21	Dallmeyer 1992
5.1677	60.6004	Ar-Ar	Hornblende	439.3	3.5	Lindås Nappe	Caledonian nappes	BA45/92	Boundy, 1996
11.3949	63.9495	Ar-Ar	Hornblende	435	4	Seve nappe	Caledonian nappes	2A	Dallmeyer 1990
5.394	60.2904	Ar-Ar	Biotite	433	3	Lindås Nappe	Caledonian nappes	B36A	Fossen and Dunlap, 1998
11.4655	63.0565	Ar-Ar	Hornblende	433	2	Fongen-Hyllingen	Caledonian nappes	H1602C	Hacker and Gans, 2005
5.0353	60.5737	Ar-Ar	White mica	432.4	1.6	Lindås Nappe	Caledonian nappes	BA1/92	Boundy, 1996
11.9008	63.7007	Ar-Ar	Hornblende	432	3	Seve nappe	Caledonian nappes	5	Dallmeyer 1990
4.96894	60.5791	Ar-Ar	White mica	432	2	Lindås Nappe	Caledonian nappes	N1m	This study
5.035	60.5708	Ar-Ar	White mica	429	2	Lindås Nappe	Caledonian nappes	BA1/92	Boundy, 1996
12.3009	64.3006	Ar-Ar	Hornblende	429	1	Møre Trøndelag Fault Zone	Caledonian nappes	1	Dallmeyer 1990
5.0378	60.5716	Ar-Ar	White mica	428.9	1.5	Lindås Nappe	Caledonian nappes	BA1/92	Boundy, 1996
11.5898	63.4493	Ar-Ar	Biotite	428	3	Gula	Caledonian nappes	H1531B1	Hacker and Gans, 2005
11.9008	63.7007	Ar-Ar	Biotite	427	1	Seve nappe	Caledonian nappes	5	Dallmeyer 1990
12.301	63.77	Ar-Ar	Hornblende	427	3	Seve nappe	Caledonian nappes	6	Dallmeyer 1990
11.3715	63.8007	Ar-Ar	Hornblende	424	5	Seve nappe	Caledonian nappes	3	Dallmeyer 1990
8.9869	61.9225	Ar-Ar	White mica	423.6	3.3	Upper Allochthon	Caledonian nappes	e1627i	Walsh 2007
11.3737	63.8016	Ar-Ar	White mica	421	2	Seve nappe	Caledonian nappes	3B	Dallmeyer 1990
11.9008	63.7007	Ar-Ar	White mica	419	1	Seve nappe	Caledonian nappes	5	Dallmeyer 1990
5.418	60.1877	Ar-Ar	Biotite	417	1.6	Skarfjell Fm.	Caledonian nappes	97-6	Fossen and Dunlap, 2006
11.7325	62.9815	Ar-Ar	White mica	417	3	Seve over Saetra	Caledonian nappes	H1602F3	Hacker and Gans, 2005
5.418	60.1877	Ar-Ar	Biotite	416.8	2	Skarfjell Fm.	Caledonian nappes	02-03	Fossen and Dunlap, 2006
9.0381	61.6688	Ar-Ar	White mica	415	2	Valdres Nappe	Caledonian nappes	M18B	Fossen and Dunlap, 1998
11.2315	63.1544	Ar-Ar	White mica	415	3	Gula	Caledonian nappes	H1602A1	Hacker and Gans, 2005
11.2093	62.8685	Ar-Ar	White mica	415	1	Gula	Caledonian nappes	H1603N4	Hacker and Gans, 2005
11.9035	63.1191	Ar-Ar	White mica	414	3	Seve (Øyfell)	Caledonian nappes	H1602D1	Hacker and Gans, 2005
8.0393	61.5866	Ar-Ar	White mica	412	2	Valdres sparagmite	Caledonian nappes	M23	Fossen and Dunlap, 1998
11.4767	63.7231	Ar-Ar	White mica	412	1	Seve (Skjøtingen)	Caledonian nappes	H1601E1	Hacker and Gans, 2005
5.3651	60.4199	Ar-Ar	Biotite	411	2	Rundemannen Fm.	Caledonian nappes	B2A	Fossen and Dunlap, 1998
5.3646	60.4202	Ar-Ar	White mica	411	2	Rundemannen Fm.	Caledonian nappes	M2A	Fossen and Dunlap, 1998
9.607	62.3073	Ar-Ar	White mica	410.5	3.4	Upper Allochthon	Caledonian nappes	e9730g1	Walsh 2007
5.4503	60.2056	Ar-Ar	White mica	410.4	0.6	Vaktdal Fm.	Caledonian nappes	01-03	Fossen and Dunlap, 2006
8.1823	61.6664	Ar-Ar	White mica	410	2	Valdres sparagmite	Caledonian nappes	M22	Fossen and Dunlap, 1998
6.1784	60.64	Ar-Ar	Biotite	408	6	Lower Bergsdalen Nappe	Caledonian nappes	B8A	Fossen and Dunlap, 1998
5.31733	60.3876	Ar-Ar	White mica	408	3	Minor Bergen Arc	Caledonian nappes	N2m	This study
9.9065	63.3284	Ar-Ar	White mica	405	1	Seve (Blåhø)	Caledonian nappes	H1604J3	Hacker and Gans, 2005
5.3003	61.1947	Ar-Ar	White mica	403.3	0.7	Hyllestad complex	Caledonian nappes	M5	Chauvet and Dallmeyer, 1992
5.5621	61.6114	Ar-Ar	White mica	402.9	1.1	Lykkjebø Group (M. Allochthon)	Caledonian nappes	M7	Chauvet and Dallmeyer, 1992
5.9798	60.4748	Ar-Ar	White mica	402.7	0.9	Lower Bergsdalen Nappe	Caledonian nappes	1	Fossen and Dallmeyer, 1998
9.699	63.3757	Ar-Ar	White mica	402.4	1		Caledonian nappes	J5816K	Walsh 2013
6.4013	60.9607	Ar-Ar	Biotite	402	2	Upper Bergsdalen Nappe	Caledonian nappes	B427	Fossen and Dunlap, 1998
8.2877	61.7026	Ar-Ar	White mica	402	3	Valdres sparagmite	Caledonian nappes	M21	Fossen and Dunlap, 1998
6.4013	60.9607	Ar-Ar	White mica	402	2	Upper Bergsdalen Nappe	Caledonian nappes	M427	Fossen and Dunlap, 1998
10.4529	63.0087	Ar-Ar	White mica	402	25	Gula	Caledonian nappes	H1603P1	Hacker and Gans, 2005
6.2279	61.7751	Ar-Ar	White mica	402	3	Lower Allochthon	Caledonian nappes	1701A1 WM	Young 2011
5.7568	60.2467	Ar-Ar	White mica	401.5	1.1	Intra-Bergsdalen Nappes decollement	Caledonian nappes	3	Fossen and Dallmeyer, 1998
8.8155	61.2886	Ar-Ar	White mica	400	3	Valdres Nappe	Caledonian nappes	M16	Fossen and Dunlap, 1998
7.2946	61.3889	Ar-Ar	White mica	400	1	Decollement phyllite	Caledonian nappes	M27	Fossen and Dunlap, 1998
5.3093	61.6416	Ar-Ar	White mica	399.2	0.7	Eikefjord Group (M. Allochthon)	Caledonian nappes	M8	Chauvet and Dallmeyer, 1992
8.8474	62.1992	Ar-Ar	White mica	399.1	3.1	Upper Allochthon	Caledonian nappes	e9731d2	Walsh 2007
9.1499	62.9879	Ar-Ar	White mica	399	1	Seve (Blåhø)	Caledonian nappes	H1604E4	Hacker and Gans, 2005
6.4939	61.8389	Ar-Ar	White mica	399	3	Lower Allochthon	Caledonian nappes	0824Q WM	Young 2011
5.992	60.3825	Ar-Ar	White mica	398.6	0.8	ntra-Bergsdalen Nappes decollement	Caledonian nappes	4	Fossen and Dallmeyer, 1998
6.0471	60.4754	Ar-Ar	White mica	398.1	0.8	Lower Bergsdalen Nappe	Caledonian nappes	2	Fossen and Dallmeyer, 1998
5.9936	60.5614	Ar-Ar	Biotite	398	3	Lower Bergsdalen Nappe	Caledonian nappes	B5	Fossen and Dunlap, 1998
6.0942	61.8395	Ar-Ar	White mica	398	3	Middle Allochthon	Caledonian nappes	1704B WM	Young 2011
5.9589	60.6397	Ar-Ar	Biotite	397	2	Lower Bergsdalen Nappe	Caledonian nappes	B33	Fossen and Dunlap, 1998
6.5162	61.7648	Ar-Ar	White mica	396	3	Lower Allochthon	Caledonian nappes	0821E WM	Young 2011
7.6909	62.007	Ar-Ar	White mica	395.2	3.1	Middle Allochthon	Caledonian nappes	e9816e	Walsh 2007
8.4486	61.7983	Ar-Ar	White mica	395	1	Decollement quartzite	Caledonian nappes	M20	Fossen and Dunlap, 1998
7.5838	62.1775	Ar-Ar	White mica	394.3	3.1	Upper Allochthon	Caledonian nappes	e1704c	Walsh 2007
5.9589	60.6397	Ar-Ar	White mica	394	2	Lower Bergsdalen Nappe	Caledonian nappes	M33	Fossen and Dunlap, 1998
6.3386	61.7526	Ar-Ar	White mica	393	0.7	Lower Allochthon	Caledonian nappes	M6	Chauvet and Dallmeyer, 1992
7.8289	61.8947	Ar-Ar	White mica	392.9	3.1	Middle Allochthon	Caledonian nappes	e9818b	Walsh 2007
7.3035	62.2938	Ar-Ar	White mica	391.2	3	Middle Allochthon	Caledonian nappes	e9804j1	Walsh 2007
5.6738	61.1496	Ar-Ar	Hornblende	556.4	1.9	Western Gneiss Region	Caledonized basement	H1	Chauvet and Dallmeyer, 1992
6.6229	61.8942	Ar-Ar	Hornblende	515	4	Western Gneiss Region	Caledonized basement	1630B HBL	Young 2011
7.7777	61.6372	Ar-Ar	White mica	510.8		Western Gneiss Region	Caledonized basement	P6804A	Walsh 2013
4.8501	60.6273	Ar-Ar	Hornblende	497.9	1.9	Øygarden Complex	Caledonized basement	BA21/92	Boundy, 1996
6.3061	61.7468	Ar-Ar	Hornblende	481	4	Western Gneiss Region	Caledonized basement	0815F HBL	Young 2011
6.7253	61.1839	Ar-Ar	White mica	441.6	1	Western Gneiss Region	Caledonized basement	M1	Chauvet and Dallmeyer, 1992
4.80242	60.9339	Ar-Ar	White mica	424	7	Western Gneiss Region	Caledonized basement	G1m	This study
5.3204	61.8657	Ar-Ar	Hornblende	421.1	0.8	Western Gneiss Region	Caledonized basement	H5	Chauvet and Dallmeyer, 1992
6.5758	61.886	Ar-Ar	Hornblende	421	3	Western Gneiss Region	Caledonized basement	1530B2 HBL	Young 2011
10.2898	64.1833	Ar-Ar	Hornblende	419	15	Northern Western Gneiss Region	Caledonized basement	4	Dallmeyer 1992
5.9236	61.9008	Ar-Ar	Hornblende	418	3	Western Gneiss Region	Caledonized basement	1607E HBL	Young 2011
4.80242	60.9339	Ar-Ar	Biotite	418	3	Western Gneiss Region	Caledonized basement	G1b	This study
5.23206	60.8865	Ar-Ar	Biotite	418	2	Western Gneiss Region	Caledonized basement	G6b	This study
6.6172	61.8988	Ar-Ar	Hornblende	414.8	6.2	Western Gneiss Region	Caledonized basement	H4	Chauvet and Dallmeyer, 1992
5.2388	60.362	Ar-Ar	Biotite	412.2	1.4	Øygarden Complex	Caledonized basement	O2b	This study
12.0009	64.3302	Ar-Ar	Hornblende	411	1	Northern Western Gneiss Region	Caledonized basement	16	Dallmeyer 1992
4.80094	60.6088	Ar-Ar	Biotite	411	2	Øygarden Complex	Caledonized basement	O6b	This study
5.3663	61.1551	Ar-Ar	Hornblende	410.6	1.5	Western Gneiss Region	Caledonized basement	H3	Chauvet and Dallmeyer, 1992
5.04107	60.1355	Ar-Ar	Biotite	410	3	Øygarden Complex	Caledonized basement	O1b	This study
5.06972	60.8621	Ar-Ar	White mica	410	1	Western Gneiss Region	Caledonized basement	G2m	This study
5.3587	60.7588	Ar-Ar	Hornblende	409.3	2.7	Western Gneiss Region	Caledonized basement	BA53/92	Boundy, 1996
4.8048	60.5699	Ar-Ar	Hornblende	408.1	3.4	Øygarden Complex	Caledonized basement	BA18/92	Boundy, 1996
11.2797	64.1006	Ar-Ar	Hornblende	407	1	Møre Trøndelag Fault Zone	Caledonized basement	11	Dallmeyer 1992
11.5022	64.5201	Ar-Ar	Hornblende	406	3	Northern Western Gneiss Region	Caledonized basement	15A	Dallmeyer 1992
4.96286	60.9101	Ar-Ar	Biotite	406	2	Western Gneiss Region	Caledonized basement	G5b	This study
9.7832	63.7679	Ar-Ar	Hornblende	406	5	Høybakken	Caledonized basement	H13Ahbl	Kendrick 2004
4.86351	60.9861	Ar-Ar	White mica	405	4	Western Gneiss Region	Caledonized basement	G3m	This study
5.2421	60.3717	Ar-Ar	White mica	404.7	0.7	Øygarden Complex	Caledonized basement	O3m	This study
5.4197	61.3349	Ar-Ar	White mica	404.1		Western Gneiss Region	Caledonized basement	K5622A5	Walsh 2013
4.9358	60.4814	Ar-Ar	Hornblende	404	1	Øygarden Complex	Caledonized basement	H1E	Fossen and Dunlap, 1998
5.03972	60.3876	Ar-Ar	Biotite	404	2	Øygarden Complex	Caledonized basement	O10b	This study
5.3663	61.1551	Ar-Ar	White mica	403.6	1.1	Western Gneiss Region	Caledonized basement	M3	Chauvet and Dallmeyer, 1992
8.5461	63.144	Ar-Ar	Hornblende	403	9	Western Gneiss Region	Caledonized basement	Hbl‐8814A	Root 2005
5.15242	60.1847	Ar-Ar	Biotite	403	3	Øygarden Complex	Caledonized basement	O4b	This study
4.80094	60.6088	Ar-Ar	White mica	403	1	Øygarden Complex	Caledonized basement	O6m	This study
7.883	62.9902	Ar-Ar	Hornblende	402	4	Western Gneiss Region	Caledonized basement	Hbl‐8814B	Root 2005
11.3124	64.1792	Ar-Ar	Hornblende	402	2	Northern Western Gneiss Region	Caledonized basement	9	Dallmeyer 1992
5.11168	60.1914	Ar-Ar	Biotite	402	2	Øygarden Complex	Caledonized basement	O8b	This study
5.16223	61.0789	Ar-Ar	White mica	402	1	Western Gneiss Region	Caledonized basement	G4m	This study
4.96286	60.9101	Ar-Ar	White mica	402	2	Western Gneiss Region	Caledonized basement	G5m	This study
4.9346	60.4817	Ar-Ar	Biotite	401	5	Øygarden Complex	Caledonized basement	B1E	Fossen and Dunlap, 1998
5.2029	61.9026	Ar-Ar	White mica	401	3	Western Gneiss Region	Caledonized basement	Ms‐R9901B1	Root 2005
4.69902	60.7693	Ar-Ar	White mica	401	5	Øygarden Complex	Caledonized basement	O7m	This study
5.11168	60.1914	Ar-Ar	White mica	401	2	Øygarden Complex	Caledonized basement	O8m	This study
11.2602	64.1699	Ar-Ar	Hornblende	400	2	Northern Western Gneiss Region	Caledonized basement	10A	Dallmeyer 1992
5.15242	60.1847	Ar-Ar	White mica	400	2	Øygarden Complex	Caledonized basement	O4m	This study
4.86351	60.9861	Ar-Ar	Biotite	400	3	Western Gneiss Region	Caledonized basement	G3b	This study
5.23206	60.8865	Ar-Ar	White mica	400	3	Western Gneiss Region	Caledonized basement	G6m	This study
6.4628	61.8047	Ar-Ar	White mica	399.4	3.4	Western Gneiss Region	Caledonized basement	e9810e	Walsh 2007
5.3454	61.1591	Ar-Ar	White mica	399.1	0.8	Western Gneiss Region	Caledonized basement	M4	Chauvet and Dallmeyer, 1992
10.1634	64.1099	Ar-Ar	Hornblende	399	13	Northern Western Gneiss Region	Caledonized basement	2	Dallmeyer 1992
5.20064	60.4714	Ar-Ar	Biotite	399	5	Øygarden Complex	Caledonized basement	O5b	This study
4.89037	60.5349	Ar-Ar	White mica	399	2	Øygarden Complex	Caledonized basement	O9m	This study
8.5517	62.5145	Ar-Ar	White mica	398.5	1.1	Western Gneiss Region	Caledonized basement	J5814H	Walsh 2013
5.7511	61.1675	Ar-Ar	White mica	397.5	1.1	Western Gneiss Region	Caledonized basement	H5622B	Walsh 2013
6.1148	61.871	Ar-Ar	White mica	397.2	0.9	Western Gneiss Region	Caledonized basement	H5622E	Walsh 2013
9.13	62.9354	Ar-Ar	White mica	397.1	0.9	Western Gneiss Region	Caledonized basement	J5816L1	Walsh 2013
8.5461	63.144	Ar-Ar	Biotite	397	4	Western Gneiss Region	Caledonized basement	Bt‐8814A	Root 2005
7.883	62.9902	Ar-Ar	Biotite	397	4	Western Gneiss Region	Caledonized basement	Bt‐8814B	Root 2005
6.1321	61.9663	Ar-Ar	Hornblende	397	4	Western Gneiss Region	Caledonized basement	1611H HBL	Young 2011
5.20064	60.4714	Ar-Ar	White mica	397	3	Øygarden Complex	Caledonized basement	O5m	This study
11.17	64.2498	Ar-Ar	Hornblende	396	2	Northern Western Gneiss Region	Caledonized basement	8A	Dallmeyer 1992
9.8297	63.6287	Ar-Ar	Hornblende	396	6	Møre Trøndelag Fault Zone	Caledonized basement	H-01	Kendrick 2004
11.3289	64.4802	Ar-Ar	Hornblende	396	2	Northern Western Gneiss Region	Caledonized basement	14	Dallmeyer 1992
10.8113	64.2501	Ar-Ar	Hornblende	396	2	Northern Western Gneiss Region	Caledonized basement	7	Dallmeyer 1992
5.4749	61.1158	Ar-Ar	White mica	395.2	1.3	Western Gneiss Region	Caledonized basement	M2	Chauvet and Dallmeyer, 1992
11.2614	64.169	Ar-Ar	Biotite	395	1	Northern Western Gneiss Region	Caledonized basement	10B	Dallmeyer 1992
12.169	64.4193	Ar-Ar	White mica	395	2	Northern Western Gneiss Region	Caledonized basement	18B	Dallmeyer 1992
6.5338	61.8611	Ar-Ar	White mica	395	3	Western Gneiss Region	Caledonized basement	1630A WM	Young 2011
5.3597	60.844	Ar-Ar	Hornblende	394.8	2.2	Western Gneiss Region	Caledonized basement	BA55/92	Boundy, 1996
5.569	61.1218	Ar-Ar	Hornblende	394.7	3.5	Western Gneiss Region	Caledonized basement	H2	Chauvet and Dallmeyer, 1992
6.2069	61.1672	Ar-Ar	White mica	394.7	0.5	Western Gneiss Region	Caledonized basement	H5622C	Walsh 2013
6.296	61.7506	Ar-Ar	White mica	394	8	Western Gneiss Region	Caledonized basement	0815G WM	Young 2011
5.7398	60.681	Ar-Ar	White mica	393.7	2	Western Gneiss Region	Caledonized basement	H5621B	Walsh 2013
10.7488	64.2202	Ar-Ar	Hornblende	393	3	Northern Western Gneiss Region	Caledonized basement	6	Dallmeyer 1992
11.4294	64.5199	Ar-Ar	White mica	393	2	Northern Western Gneiss Region	Caledonized basement	15B	Dallmeyer 1992
11.2506	64.1699	Ar-Ar	White mica	393	1	Northern Western Gneiss Region	Caledonized basement	10B	Dallmeyer 1992
5.55587	60.9608	Ar-Ar	White mica	393	2	Western Gneiss Region	Caledonized basement	G7m	This study
11.3807	64.4299	Ar-Ar	White mica	392	2	Northern Western Gneiss Region	Caledonized basement	13	Dallmeyer 1992
11.2192	64.2494	Ar-Ar	White mica	392	1	Northern Western Gneiss Region	Caledonized basement	8B	Dallmeyer 1992
7.6648	62.4551	Ar-Ar	White mica	391.5	3.1	Western Gneiss Region	Caledonized basement	e9804c7	Walsh 2007
9.8297	63.6287	Ar-Ar	Biotite	391	6	Møre Trøndelag Fault Zone	Caledonized basement	H-01	Kendrick 2004
6.568	61.997	Ar-Ar	White mica	390.3	3	Western Gneiss Region	Caledonized basement	e9809g3	Walsh 2007
12.2519	64.3486	Ar-Ar	White mica	390	2	Northern Western Gneiss Region	Caledonized basement	17	Dallmeyer 1992
6.082	62.583	Ar-Ar	Biotite	390	5	Western Gneiss Region	Caledonized basement	Bt‐8823B1	Root 2005
6.1025	61.9848	Ar-Ar	White mica	390	3	Western Gneiss Region	Caledonized basement	1611L3 WM	Young 2011
6.9235	62.1289	Ar-Ar	White mica	389.78	3	Western Gneiss Region	Caledonized basement	e9809c	Walsh 2007
6.824	62.0755	Ar-Ar	White mica	389.7	1.1	Western Gneiss Region	Caledonized basement	E1612Q8	Walsh 2013
9.056	63.1609	Ar-Ar	White mica	389.6	0.9	Western Gneiss Region	Caledonized basement	J5816J	Walsh 2013
6.4204	62.2907	Ar-Ar	White mica	389.3	0.9	Western Gneiss Region	Caledonized basement	E9814A6	Walsh 2013
8.0514	62.6594	Ar-Ar	White mica	389.3	0.9	Western Gneiss Region	Caledonized basement	J5813F	Walsh 2013
6.0413	62.4837	Ar-Ar	White mica	388.8	0.9	Western Gneiss Region	Caledonized basement	H5702A	Walsh 2013
7.4421	62.6882	Ar-Ar	White mica	388.6	0.9	Western Gneiss Region	Caledonized basement	J5814S	Walsh 2013
7.1114	61.9073	Ar-Ar	White mica	388.2	0.9	Western Gneiss Region	Caledonized basement	J5811D	Walsh 2013
5.4945	61.9601	Ar-Ar	White mica	388.2	0.9	Western Gneiss Region	Caledonized basement	P6805H2	Walsh 2013
8.0904	62.875	Ar-Ar	White mica	388.1	1	Western Gneiss Region	Caledonized basement	J5814N4	Walsh 2013
5.6628	62.0374	Ar-Ar	White mica	387.4	0.9	Western Gneiss Region	Caledonized basement	P5629O	Walsh 2013
5.9764	62.1933	Ar-Ar	White mica	387.1	0.9	Western Gneiss Region	Caledonized basement	E1612C7	Walsh 2013
8.5168	63.1667	Ar-Ar	White mica	386.6	2.3	Western Gneiss Region	Caledonized basement	J5816A	Walsh 2013
9.8105	63.8998	Ar-Ar	Hornblende	386	4	Høybakken	Caledonized basement	H07	Kendrick 2004
9.7832	63.7679	Ar-Ar	White mica	386	6	Høybakken	Caledonized basement	H13-B	Kendrick 2004
6.0973	62.3063	Ar-Ar	White mica	385.8	0.8	Western Gneiss Region	Caledonized basement	P5627F3	Walsh 2013
6.321	62.3743	Ar-Ar	White mica	385.3	1.7	Western Gneiss Region	Caledonized basement	P5627K	Walsh 2013
5.3231	61.8595	Ar-Ar	White mica	385.1	0.7	Western Gneiss Region	Caledonized basement	M9	Chauvet and Dallmeyer, 1992
9.8105	63.8998	Ar-Ar	Biotite	385	4	Høybakken	Caledonized basement	H07	Kendrick 2004
8.9969	63.3396	Ar-Ar	White mica	384.8	2.2	Western Gneiss Region	Caledonized basement	J5816I	Walsh 2013
8.2832	63.2453	Ar-Ar	White mica	384.2	1.1	Western Gneiss Region	Caledonized basement	J5815K	Walsh 2013
5.6873	62.2981	Ar-Ar	White mica	384.2	1	Western Gneiss Region	Caledonized basement	P6816B1	Walsh 2013
5.4766	62.2317	Ar-Ar	White mica	384	3	Western Gneiss Region	Caledonized basement	Ms‐8908B2	Root 2005
9.8004	63.9002	Ar-Ar	Biotite	384	6	Høybakken	Caledonized basement	H12	Kendrick 2004
6.1681	62.2639	Ar-Ar	White mica	383.7	1.2	Western Gneiss Region	Caledonized basement	P5627E2	Walsh 2013
6.6749	62.674	Ar-Ar	White mica	383.7	1.2	Western Gneiss Region	Caledonized basement	P6818C2	Walsh 2013
8.6845	63.3496	Ar-Ar	White mica	382.7	1.8	Western Gneiss Region	Caledonized basement	J5816B	Walsh 2013
5.558	62.2896	Ar-Ar	White mica	382.4	1	Western Gneiss Region	Caledonized basement	8907B5	Walsh 2013
5.4566	62.2147	Ar-Ar	White mica	382	3	Western Gneiss Region	Caledonized basement	Ms‐8907C3	Root 2005
9.8004	63.9002	Ar-Ar	White mica	382	6	Høybakken	Caledonized basement	H12	Kendrick 2004
5.531	62.2584	Ar-Ar	White mica	381.7	0.9	Western Gneiss Region	Caledonized basement	8815G12	Walsh 2013
9.8004	63.9002	Ar-Ar	Biotite	381	3	Høybakken	Caledonized basement	H08	Kendrick 2004
6.4264	62.7139	Ar-Ar	Biotite	380	4	Western Gneiss Region	Caledonized basement	Bt‐93FJ39	Root 2005
5.6738	62.3253	Ar-Ar	White mica	380	3	Western Gneiss Region	Caledonized basement	Ms‐8828A2	Root 2005
5.2429	62.1855	Ar-Ar	White mica	380	3	Western Gneiss Region	Caledonized basement	Ms‐8911B1	Root 2005
6.0994	61.9302	Ar-Ar	White mica	380	3	Western Gneiss Region	Caledonized basement	1611B1A WM	Young 2011
5.1594	62.1283	Ar-Ar	White mica	379.8	1	Western Gneiss Region	Caledonized basement	P6806J	Walsh 2013
7.0213	62.9467	Ar-Ar	White mica	379.7	1	Western Gneiss Region	Caledonized basement	J5815G	Walsh 2013
5.6302	62.3782	Ar-Ar	White mica	378	3	Western Gneiss Region	Caledonized basement	Ms‐8906A6	Root 2005
6.8004	62.8141	Ar-Ar	White mica	377.5	0.8	Western Gneiss Region	Caledonized basement	J5815B1	Walsh 2013
7.0151	62.8546	Ar-Ar	White mica	375.6	1.2	Western Gneiss Region	Caledonized basement	J5815E1	Walsh 2013
5.6735	62.3723	Ar-Ar	White mica	374	3	Western Gneiss Region	Caledonized basement	Ms‐8830B2	Root 2005
5.2001	62.102	Ar-Ar	White mica	369	3	Western Gneiss Region	Caledonized basement	Ms‐8913A1	Root 2005
5.1489	61.2259	U-Pb	Monazite	457	2.5	Hyllestad	Caledonian nappes	W1	Hacker 2015
5.2093	61.222	U-Pb	Monazite	454	1.5	Hyllestad	Caledonian nappes	W2	Hacker 2015
5.3053	61.1638	U-Pb	Monazite	432	4.2	Hyllestad	Caledonian nappes	W5	Hacker 2015
11.2315	63.1544	U-Pb	Monazite	430	20	Gula	Caledonian nappes	E5	Hacker 2015
11.5898	63.4493	U-Pb	Monazite	430	3.3	Gula	Caledonian nappes	E6	Hacker 2015
9.9065	63.3284	U-Pb	Monazite	426	20	Gula	Caledonian nappes	E3	Hacker 2015
11.8907	63.6999	U-Pb	Monazite	426	3.4	Gula	Caledonian nappes	E7	Hacker 2015
5.3053	61.1638	U-Pb	Monazite	424	0.7	Hyllestad	Caledonian nappes	W4	Hacker 2015
5.3053	61.1638	U-Pb	Monazite	421	1.6	Hyllestad	Caledonian nappes	W3	Hacker 2015
8.917	62.1824	U-Pb	Monazite	420	12	Blåhø	Caledonian nappes	E1	Hacker 2015
11.2093	62.8685	U-Pb	Monazite	419	6.5	Gula	Caledonian nappes	E4	Hacker 2015
9.1499	62.9879	U-Pb	Monazite	410	1.1	Blåhø	Caledonian nappes	E2	Hacker 2015
8.917	62.1824	U-Pb	Monazite	405	4.2	Blåhø	Caledonian nappes	E1	Hacker 2015
7.0368	62.9648	U-Pb	Monazite	1700	100	Western Gneiss Region	Caledonized basement	B26	Hacker 2015
7.6648	62.4551	U-Pb	Monazite	1632	14	Western Gneiss Region	Caledonized basement	B22	Hacker 2015
7.7368	62.5329	U-Pb	Monazite	1611	7	Western Gneiss Region	Caledonized basement	B23	Hacker 2015
5.8397	62.0688	U-Pb	Monazite	1600	100	Western Gneiss Region	Caledonized basement	B4	Hacker 2015
6.7123	61.8846	U-Pb	Monazite	1600	100	Western Gneiss Region	Caledonized basement	B8	Hacker 2015
6.6817	62.1098	U-Pb	Monazite	1600	100	Western Gneiss Region	Caledonized basement	B12	Hacker 2015
5.1697	62.192	U-Pb	Monazite	1565	19	Western Gneiss Region	Caledonized basement	B3	Hacker 2015
7.6716	62.8658	U-Pb	Monazite	1200	100	Western Gneiss Region	Caledonized basement	B27	Hacker 2015
6.3809	62.7114	U-Pb	Monazite	1000	100	Western Gneiss Region	Caledonized basement	(H) B24	Hacker 2015
7.7368	62.5329	U-Pb	Monazite	970	12	Western Gneiss Region	Caledonized basement	B23	Hacker 2015
5.8397	62.0688	U-Pb	Monazite	968	7	Western Gneiss Region	Caledonized basement	B4	Hacker 2015
6.0769	62.1008	U-Pb	Monazite	962	13	Western Gneiss Region	Caledonized basement	B15	Hacker 2015
6.7123	61.8846	U-Pb	Monazite	960	100	Western Gneiss Region	Caledonized basement	B8	Hacker 2015
6.6817	62.1098	U-Pb	Monazite	954	5	Western Gneiss Region	Caledonized basement	B12	Hacker 2015
5.6288	62.4048	U-Pb	Monazite	950	14	Western Gneiss Region	Caledonized basement	B18	Hacker 2015
4.9542	60.9753	U-Pb	Monazite	949	3	Western Gneiss Region	Caledonized basement	M	Røhr 2004
5.6578	62.4003	U-Pb	Monazite	930	100	Western Gneiss Region	Caledonized basement	B19	Hacker 2015
5.1697	62.192	U-Pb	Monazite	923	6	Western Gneiss Region	Caledonized basement	B3	Hacker 2015
6.9251	62.1572	U-Pb	Monazite	911	11	Western Gneiss Region	Caledonized basement	B11	Hacker 2015
7.6716	62.8658	U-Pb	Monazite	433	3	Western Gneiss Region	Caledonized basement	B27	Hacker 2015
6.3809	62.7114	U-Pb	Monazite	427	1.7	Western Gneiss Region	Caledonized basement	(H) B24	Hacker 2015
7.6716	62.8658	U-Pb	Monazite	426	0.9	Western Gneiss Region	Caledonized basement	B27	Hacker 2015
6.3809	62.7114	U-Pb	Monazite	424	3	Western Gneiss Region	Caledonized basement	(H) B24	Hacker 2015
5.9806	61.9993	U-Pb	Monazite	421	3	Western Gneiss Region	Caledonized basement	B6	Hacker 2015
7.6716	62.8658	U-Pb	Monazite	412	2.2	Western Gneiss Region	Caledonized basement	B27	Hacker 2015
7.6716	62.8658	U-Pb	Monazite	411	1.7	Western Gneiss Region	Caledonized basement	(H) B2	Hacker 2015
6.7721	62.2893	U-Pb	Monazite	403	3.4	Western Gneiss Region	Caledonized basement	B21	Hacker 2015
6.274	62.0664	U-Pb	Monazite	402	0.7	Western Gneiss Region	Caledonized basement	(H) B13	Hacker 2015
7.6648	62.4551	U-Pb	Monazite	400	100	Western Gneiss Region	Caledonized basement	B22	Hacker 2015
7.7368	62.5329	U-Pb	Monazite	399	3.4	Western Gneiss Region	Caledonized basement	B23	Hacker 2015
7.6716	62.8658	U-Pb	Monazite	398	1.1	Western Gneiss Region	Caledonized basement	(H) B2	Hacker 2015
5.2114	62.102	U-Pb	Monazite	397	1.7	Western Gneiss Region	Caledonized basement	B1	Hacker 2015
5.6288	62.4048	U-Pb	Monazite	397	3.2	Western Gneiss Region	Caledonized basement	B19	Hacker 2015
6.7721	62.2893	U-Pb	Monazite	396	3.4	Western Gneiss Region	Caledonized basement	B21	Hacker 2015
6.9235	62.1289	U-Pb	Monazite	394	0.9	Western Gneiss Region	Caledonized basement	B10	Hacker 2015
6.3809	62.7114	U-Pb	Monazite	393	3.3	Western Gneiss Region	Caledonized basement	(H) B24	Hacker 2015
7.0368	62.9648	U-Pb	Monazite	392	1.5	Western Gneiss Region	Caledonized basement	B26	Hacker 2015
5.2114	62.102	U-Pb	Monazite	391	3	Western Gneiss Region	Caledonized basement	B1	Hacker 2015
6.4187	62.0393	U-Pb	Monazite	391	1.5	Western Gneiss Region	Caledonized basement	B7	Hacker 2015
6.8821	62.098	U-Pb	Monazite	389	1.1	Western Gneiss Region	Caledonized basement	B9	Hacker 2015
5.6989	62.2964	U-Pb	Monazite	389	2	Western Gneiss Region	Caledonized basement	B17	Hacker 2015
5.9806	61.9993	U-Pb	Monazite	387	1.5	Western Gneiss Region	Caledonized basement	B6	Hacker 2015
5.9676	61.9916	U-Pb	Monazite	386	1.6	Western Gneiss Region	Caledonized basement	B5	Hacker 2015
6.1728	62.0812	U-Pb	Monazite	386	0.6	Western Gneiss Region	Caledonized basement	B14	Hacker 2015
6.4204	62.2907	U-Pb	Monazite	384	1.2	Western Gneiss Region	Caledonized basement	B20	Hacker 2015
6.0891	62.3419	U-Pb	Monazite	383	1.1	Western Gneiss Region	Caledonized basement	B16	Hacker 2015
7.0151	62.8546	U-Pb	Monazite	383	1.2	Western Gneiss Region	Caledonized basement	B25	Hacker 2015
5.6288	62.4048	U-Pb	Monazite	382	2.4	Western Gneiss Region	Caledonized basement	B18	Hacker 2015
5.6288	62.4048	U-Pb	Monazite	380	2.8	Western Gneiss Region	Caledonized basement	B19	Hacker 2015
5.8242	62.3418	U-Pb	Monazite	427	5.6	Western Gneiss Region	Caledonized basement cover	(H) M6	Hacker 2015
7.8003	61.9094	U-Pb	Monazite	420	20	Western Gneiss Region	Caledonized basement cover	(H) M28	Hacker 2015
5.6773	62.2948	U-Pb	Monazite	406	3.3	Western Gneiss Region	Caledonized basement cover	(H) M4	Hacker 2015
7.8003	61.9094	U-Pb	Monazite	401	2.7	Western Gneiss Region	Caledonized basement cover	(H) M28	Hacker 2015
6.3607	62.4445	U-Pb	Monazite	399	1.7	Western Gneiss Region	Caledonized basement cover	M10	Hacker 2015
7.8003	61.9094	U-Pb	Monazite	399	2.3	Western Gneiss Region	Caledonized basement cover	(H) M28	Hacker 2015
5.6773	62.2948	U-Pb	Monazite	398	2.7	Western Gneiss Region	Caledonized basement cover	(H) M4	Hacker 2015
7.3454	62.2915	U-Pb	Monazite	398	1.7	Western Gneiss Region	Caledonized basement cover	M23	Hacker 2015
7.2766	61.5586	U-Pb	Monazite	397	2.3	Western Gneiss Region	Caledonized basement cover	M21	Hacker 2015
6.6218	62.4885	U-Pb	Monazite	396	0.9	Western Gneiss Region	Caledonized basement cover	M11	Hacker 2015
7.8003	61.9094	U-Pb	Monazite	396	1.3	Western Gneiss Region	Caledonized basement cover	M27	Hacker 2015
8.5217	62.2549	U-Pb	Monazite	396	1.1	Western Gneiss Region	Caledonized basement cover	M29	Hacker 2015
8.8474	62.1992	U-Pb	Monazite	396	4.3	Western Gneiss Region	Caledonized basement cover	M30	Hacker 2015
5.8242	62.3418	U-Pb	Monazite	395	1.2	Western Gneiss Region	Caledonized basement cover	(H) M6	Hacker 2015
6.5227	62.6398	U-Pb	Monazite	395	0.8	Western Gneiss Region	Caledonized basement cover	M12	Hacker 2015
7.2077	62.452	U-Pb	Monazite	395	1.2	Western Gneiss Region	Caledonized basement cover	M18	Hacker 2015
7.2077	62.452	U-Pb	Monazite	394	1.3	Western Gneiss Region	Caledonized basement cover	M19	Hacker 2015
7.3035	62.2938	U-Pb	Monazite	394	1.3	Western Gneiss Region	Caledonized basement cover	M22	Hacker 2015
7.6073	62.0382	U-Pb	Monazite	394	1.4	Western Gneiss Region	Caledonized basement cover	M26	Hacker 2015
5.4143	62.2615	U-Pb	Monazite	393	1.1	Western Gneiss Region	Caledonized basement cover	M3	Hacker 2015
5.6773	62.2948	U-Pb	Monazite	393	0.6	Western Gneiss Region	Caledonized basement cover	(H) M4	Hacker 2015
7.4695	62.2061	U-Pb	Monazite	393	1.8	Western Gneiss Region	Caledonized basement cover	M24	Hacker 2015
5.4593	62.2133	U-Pb	Monazite	390	1.3	Western Gneiss Region	Caledonized basement cover	M2	Hacker 2015
5.5056	62.3603	U-Pb	Monazite	390	1.5	Western Gneiss Region	Caledonized basement cover	M5	Hacker 2015
5.8242	62.3418	U-Pb	Monazite	390	2.1	Western Gneiss Region	Caledonized basement cover	(H) M6	Hacker 2015
6.2067	62.4419	U-Pb	Monazite	390	0.9	Western Gneiss Region	Caledonized basement cover	M9	Hacker 2015
7.2701	62.7271	U-Pb	Monazite	389	1.3	Western Gneiss Region	Caledonized basement cover	M14	Hacker 2015
6.0177	62.1682	U-Pb	Monazite	388	3.2	Western Gneiss Region	Caledonized basement cover	M7	Hacker 2015
7.2077	62.452	U-Pb	Monazite	388	2.2	Western Gneiss Region	Caledonized basement cover	M20	Hacker 2015
7.5877	62.1766	U-Pb	Monazite	388	3.1	Western Gneiss Region	Caledonized basement cover	M25	Hacker 2015
5.6773	62.2948	U-Pb	Monazite	387	1.4	Western Gneiss Region	Caledonized basement cover	(H) M4	Hacker 2015
6.797	62.8097	U-Pb	Monazite	387	2.1	Western Gneiss Region	Caledonized basement cover	M13	Hacker 2015
7.6794	62.9616	U-Pb	Monazite	386	1.3	Western Gneiss Region	Caledonized basement cover	M15	Hacker 2015
6.945	62.4028	U-Pb	Monazite	386	2.1	Western Gneiss Region	Caledonized basement cover	M17	Hacker 2015
8.4084	62.9055	U-Pb	Monazite	385	4.9	Western Gneiss Region	Caledonized basement cover	M16	Hacker 2015
5.4593	62.2133	U-Pb	Monazite	383	1.1	Western Gneiss Region	Caledonized basement cover	M1	Hacker 2015
6.1735	62.6078	U-Pb	Monazite	382	1.2	Western Gneiss Region	Caledonized basement cover	M8	Hacker 2015
6.6015	61.8926	U-Pb	Titanite	983	49	Western Gneiss Region	Caledonized basement	Y1525A5	Spencer 2013
6.448	62.6077	U-Pb	Titanite	977	100	Western Gneiss Region	Caledonized basement	P6818A1	Spencer 2013
6.6015	61.2077	U-Pb	Titanite	971	5	Western Gneiss Region	Caledonized basement	5	Skar 2003
6.9604	61.8721	U-Pb	Titanite	966	25	Western Gneiss Region	Caledonized basement	E9810C1	Spencer 2013
6.4475	61.1136	U-Pb	Titanite	966	10	Western Gneiss Region	Caledonized basement	4	Skar 2003
6.7181	61.1823	U-Pb	Titanite	964	4	Western Gneiss Region	Caledonized basement	5b	Skar 2003
6.541	61.1461	U-Pb	Titanite	958	3	Western Gneiss Region	Caledonized basement	3	Skar 2003
6.5422	61.1426	U-Pb	Titanite	951	3	Western Gneiss Region	Caledonized basement	6	Skar 2003
5.7146	61.8811	U-Pb	Titanite	872	110	Western Gneiss Region	Caledonized basement	G9702F	Spencer 2013
6.374	61.6804	U-Pb	Titanite	854	100	Western Gneiss Region	Caledonized basement	Y0814E3	Spencer 2013
7.2632	61.9374	U-Pb	Titanite	753	100	Western Gneiss Region	Caledonized basement	E1608G11	Spencer 2013
6.9141	62.7479	U-Pb	Titanite	686	100	Western Gneiss Region	Caledonized basement	A0715C1	Spencer 2013
5.279	61.869	U-Pb	Titanite	426.7	5.5	Western Gneiss Region	Caledonized basement	G9702E1	Spencer 2013
7.4634	62.6847	U-Pb	Titanite	416.3	4.2	Western Gneiss Region	Caledonized basement	A0725K	Spencer 2013
7.7435	62.9683	U-Pb	Titanite	412.1	4.8	Western Gneiss Region	Caledonized basement	K1801F1	Spencer 2013
6.2766	62.4469	U-Pb	Titanite	408.4	1.6	Western Gneiss Region	Caledonized basement	K1729F5	Spencer 2013
7.3781	62.5783	U-Pb	Titanite	407.9	1.5	Western Gneiss Region	Caledonized basement	K1730G1	Spencer 2013
5.531	62.2584	U-Pb	Titanite	407.7	4.8	Western Gneiss Region	Caledonized basement	8815G4	Spencer 2013
6.9077	62.5885	U-Pb	Titanite	407.7	3.1	Western Gneiss Region	Caledonized basement	M8710F1	Spencer 2013
6.787	62.5808	U-Pb	Titanite	405.7	2.5	Western Gneiss Region	Caledonized basement	G9706V1	Spencer 2013
5.3093	61.9784	U-Pb	Titanite	405.5	7.5	Western Gneiss Region	Caledonized basement	A0715S	Spencer 2013
6.5809	62.5225	U-Pb	Titanite	405.3	1.7	Western Gneiss Region	Caledonized basement	A0801M	Spencer 2013
6.1209	62.5874	U-Pb	Titanite	404.9	2.4	Western Gneiss Region	Caledonized basement	A0722G3	Spencer 2013
6.8264	62.4801	U-Pb	Titanite	403.4	4	Western Gneiss Region	Caledonized basement	E9806G1	Spencer 2013
5.4063	62.0604	U-Pb	Titanite	403.4	6.1	Western Gneiss Region	Caledonized basement	K7718I1	Spencer 2013
6.3011	62.4905	U-Pb	Titanite	403.2	3.3	Western Gneiss Region	Caledonized basement	A0722B1	Spencer 2013
8.0449	62.3574	U-Pb	Titanite	403.1	1.6	Western Gneiss Region	Caledonized basement	E9803K2	Spencer 2013
5.989	62.4053	U-Pb	Titanite	403	6.2	Western Gneiss Region	Caledonized basement	8822A9	Spencer 2013
6.1996	62.4921	U-Pb	Titanite	403	3.1	Western Gneiss Region	Caledonized basement	A0722D1	Spencer 2013
6.6977	62.6672	U-Pb	Titanite	402.5	2.1	Western Gneiss Region	Caledonized basement	A0727H1	Spencer 2013
5.9703	62.2525	U-Pb	Titanite	402	3.3	Western Gneiss Region	Caledonized basement	P5627D1	Spencer 2013
6.945	62.4028	U-Pb	Titanite	401.8	1.7	Western Gneiss Region	Caledonized basement	E9806B2	Spencer 2013
6.5301	62.4995	U-Pb	Titanite	400.8	2.9	Western Gneiss Region	Caledonized basement	G9704G1	Spencer 2013
6.4353	62.5323	U-Pb	Titanite	400.7	4.8	Western Gneiss Region	Caledonized basement	A0723D1	Spencer 2013
5.4719	62.1914	U-Pb	Titanite	400	4.5	Western Gneiss Region	Caledonized basement	P5630G2	Spencer 2013
6.8738	62.694	U-Pb	Titanite	399.5	4.2	Western Gneiss Region	Caledonized basement	A0727N1	Spencer 2013
6.2504	62.5689	U-Pb	Titanite	399.5	8	Western Gneiss Region	Caledonized basement	M8710A1	Spencer 2013
6.782	62.8064	U-Pb	Titanite	399.4	2.9	Western Gneiss Region	Caledonized basement	A0725J4	Spencer 2013
6.7923	62.0783	U-Pb	Titanite	399.2	1.7	Western Gneiss Region	Caledonized basement	K1725C	Spencer 2013
7.1293	62.5369	U-Pb	Titanite	399.1	1.7	Western Gneiss Region	Caledonized basement	P6826I1	Spencer 2013
6.0985	62.1186	U-Pb	Titanite	398.8	3.9	Western Gneiss Region	Caledonized basement	P5628E5	Spencer 2013
5.1416	61.9603	U-Pb	Titanite	398.8	2.5	Western Gneiss Region	Caledonized basement	P6824F1	Spencer 2013
5.9895	62.2133	U-Pb	Titanite	398.2	2	Western Gneiss Region	Caledonized basement	K1728B	Spencer 2013
6.9865	62.7795	U-Pb	Titanite	398.1	3.6	Western Gneiss Region	Caledonized basement	K1802H	Spencer 2013
5.1589	62.1291	U-Pb	Titanite	398	5.4	Western Gneiss Region	Caledonized basement	8912C3	Spencer 2013
7.7908	62.9738	U-Pb	Titanite	398	2.2	Western Gneiss Region	Caledonized basement	M8711C1	Spencer 2013
6.1875	62.6312	U-Pb	Titanite	397.9	1.8	Western Gneiss Region	Caledonized basement	A0721G1	Spencer 2013
6.0972	62.5063	U-Pb	Titanite	397.7	3.1	Western Gneiss Region	Caledonized basement	G9705R1	Spencer 2013
6.6373	62.6566	U-Pb	Titanite	397.1	2.4	Western Gneiss Region	Caledonized basement	A0727C1	Spencer 2013
5.961	62.4825	U-Pb	Titanite	397	1.7	Western Gneiss Region	Caledonized basement	K1729A1	Spencer 2013
5.5518	62.1724	U-Pb	Titanite	396.8	3.6	Western Gneiss Region	Caledonized basement	P6815G1	Spencer 2013
6.4056	62.3064	U-Pb	Titanite	396.7	3	Western Gneiss Region	Caledonized basement	E9814B2	Spencer 2013
5.6336	62.1913	U-Pb	Titanite	396.3	3.5	Western Gneiss Region	Caledonized basement	A0717M3	Spencer 2013
5.7912	62.303	U-Pb	Titanite	396.3	4.6	Western Gneiss Region	Caledonized basement	A0719H1	Spencer 2013
5.6037	62.2966	U-Pb	Titanite	396.2	2.3	Western Gneiss Region	Caledonized basement	A0718C1	Spencer 2013
5.2979	61.9866	U-Pb	Titanite	396	17	Western Gneiss Region	Caledonized basement	A0715R1	Spencer 2013
6.1226	62.4719	U-Pb	Titanite	396	2.8	Western Gneiss Region	Caledonized basement	A0720P1	Spencer 2013
6.2378	62.6927	U-Pb	Titanite	396	15	Western Gneiss Region	Caledonized basement	A0721E5	Spencer 2013
6.5168	62.6406	U-Pb	Titanite	396	2.7	Western Gneiss Region	Caledonized basement	G9707A1	Spencer 2013
5.8421	62.3953	U-Pb	Titanite	395.9	1.4	Western Gneiss Region	Caledonized basement	A0805C1	Spencer 2013
6.1209	62.5874	U-Pb	Titanite	395.5	3.3	Western Gneiss Region	Caledonized basement	A0722G5	Spencer 2013
6.6185	62.5671	U-Pb	Titanite	395.4	2.5	Western Gneiss Region	Caledonized basement	A0723A1	Spencer 2013
5.6978	62.1997	U-Pb	Titanite	395.3	1.7	Western Gneiss Region	Caledonized basement	A0717J1	Spencer 2013
6.0406	62.2008	U-Pb	Titanite	395.3	6.8	Western Gneiss Region	Caledonized basement	P5710A5	Spencer 2013
6.1149	61.8218	U-Pb	Titanite	395	14	Western Gneiss Region	Caledonized basement	Y0829J2	Spencer 2013
5.8492	62.0207	U-Pb	Titanite	394.8	2.3	Western Gneiss Region	Caledonized basement	P5628U	Spencer 2013
6.2417	62.571	U-Pb	Titanite	394.7	4.3	Western Gneiss Region	Caledonized basement	A0721A1	Spencer 2013
6.909	62.5614	U-Pb	Titanite	394	2.4	Western Gneiss Region	Caledonized basement	K1730C1	Spencer 2013
6.5033	62.4324	U-Pb	Titanite	393.9	2.3	Western Gneiss Region	Caledonized basement	A0720J2	Spencer 2013
5.1834	62.119	U-Pb	Titanite	393.5	9.4	Western Gneiss Region	Caledonized basement	P6807A2	Spencer 2013
6.4501	62.5704	U-Pb	Titanite	393.4	2.7	Western Gneiss Region	Caledonized basement	G9706N1	Spencer 2013
6.2848	62.0718	U-Pb	Titanite	392.8	2.1	Western Gneiss Region	Caledonized basement	P6821A1	Spencer 2013
5.7207	62.3154	U-Pb	Titanite	392.7	2.3	Western Gneiss Region	Caledonized basement	A0718F1	Spencer 2013
7.2619	62.2386	U-Pb	Titanite	392.6	5.5	Western Gneiss Region	Caledonized basement	E9808H	Spencer 2013
6.0841	62.5878	U-Pb	Titanite	392.4	4.8	Western Gneiss Region	Caledonized basement	A0722H1	Spencer 2013
5.0755	61.9119	U-Pb	Titanite	391.9	4.7	Western Gneiss Region	Caledonized basement	A0714L1	Spencer 2013
6.3774	62.5345	U-Pb	Titanite	391.7	2.2	Western Gneiss Region	Caledonized basement	G9705Y1	Spencer 2013
5.4072	62.2445	U-Pb	Titanite	390.8	2.9	Western Gneiss Region	Caledonized basement	R9829C3	Spencer 2013
5.5056	62.3603	U-Pb	Titanite	390.6	2.5	Western Gneiss Region	Caledonized basement	8830A11	Spencer 2013
6.5336	61.9722	U-Pb	Titanite	390.3	5.7	Western Gneiss Region	Caledonized basement	J5810D	Spencer 2013
6.4038	62.0417	U-Pb	Titanite	390.1	2.8	Western Gneiss Region	Caledonized basement	P5624I9	Spencer 2013
5.7183	62.3218	U-Pb	Titanite	390.1	2.5	Western Gneiss Region	Caledonized basement	R3704A6	Spencer 2013
6.6722	62.6911	U-Pb	Titanite	390	12	Western Gneiss Region	Caledonized basement	G9707N1	Spencer 2013
5.5518	62.1724	U-Pb	Titanite	389.6	1.6	Western Gneiss Region	Caledonized basement	P6815G1	Spencer 2013
7.4285	62.2531	U-Pb	Titanite	389.2	4.1	Western Gneiss Region	Caledonized basement	E9805K	Spencer 2013
5.6364	62.1712	U-Pb	Titanite	389	1.9	Western Gneiss Region	Caledonized basement	P6815F2	Spencer 2013
5.5392	62.1764	U-Pb	Titanite	389	4.6	Western Gneiss Region	Caledonized basement	P6815H1	Spencer 2013
6.0972	62.5063	U-Pb	Titanite	388.9	1.6	Western Gneiss Region	Caledonized basement	G9705R2	Spencer 2013
5.8242	62.3418	U-Pb	Titanite	388.8	3.1	Western Gneiss Region	Caledonized basement	R9823A1	Spencer 2013
5.8176	62.2777	U-Pb	Titanite	388.8	2.4	Western Gneiss Region	Caledonized basement	R1617B1	Spencer 2013
5.9458	62.2173	U-Pb	Titanite	388.7	6.6	Western Gneiss Region	Caledonized basement	E1612D1	Spencer 2013
5.4834	62.2571	U-Pb	Titanite	388.6	2.2	Western Gneiss Region	Caledonized basement	R9828B2	Spencer 2013
7.2125	62.2499	U-Pb	Titanite	388.5	5.3	Western Gneiss Region	Caledonized basement	E9808I	Spencer 2013
5.6116	62.2955	U-Pb	Titanite	388.4	2.6	Western Gneiss Region	Caledonized basement	A0718D	Spencer 2013
7.5067	62.5345	U-Pb	Titanite	388.4	2.5	Western Gneiss Region	Caledonized basement	K1730H1	Spencer 2013
5.9521	62.2015	U-Pb	Titanite	388.1	2.6	Western Gneiss Region	Caledonized basement	P5626N	Spencer 2013
5.5793	62.1951	U-Pb	Titanite	387.9	3	Western Gneiss Region	Caledonized basement	A0717P1	Spencer 2013
5.4143	62.2615	U-Pb	Titanite	387.9	3.1	Western Gneiss Region	Caledonized basement	R9828C8	Spencer 2013
6.321	62.3743	U-Pb	Titanite	387.5	2.6	Western Gneiss Region	Caledonized basement	P5627K4	Spencer 2013
5.0517	61.9426	U-Pb	Titanite	387.1	4.5	Western Gneiss Region	Caledonized basement	K7717K	Spencer 2013
6.495	62.5395	U-Pb	Titanite	387	3	Western Gneiss Region	Caledonized basement	R9821D2	Spencer 2013
5.6578	62.4003	U-Pb	Titanite	386.3	2.8	Western Gneiss Region	Caledonized basement	R9824B4	Spencer 2013
7.0653	62.8174	U-Pb	Titanite	386.2	2.5	Western Gneiss Region	Caledonized basement	K1802J	Spencer 2013
6.4712	62.7845	U-Pb	Titanite	386.1	2.7	Western Gneiss Region	Caledonized basement	G9709K1	Spencer 2013
5.5919	62.4059	U-Pb	Titanite	385.7	4.7	Western Gneiss Region	Caledonized basement	8829A2	Spencer 2013
6.4163	62.1945	U-Pb	Titanite	385.6	3.3	Western Gneiss Region	Caledonized basement	K1803C1	Spencer 2013
5.2999	61.9621	U-Pb	Titanite	385.5	7.6	Western Gneiss Region	Caledonized basement	A0715M2	Spencer 2013
6.2333	62.4014	U-Pb	Titanite	385.5	1.6	Western Gneiss Region	Caledonized basement	K5702D2	Spencer 2013
6.7241	62.6444	U-Pb	Titanite	385.3	2.5	Western Gneiss Region	Caledonized basement	M8710E1	Spencer 2013
5.2711	62.1733	U-Pb	Titanite	385	10	Western Gneiss Region	Caledonized basement	8911A5	Spencer 2013
6.0415	62.5109	U-Pb	Titanite	384.7	3.2	Western Gneiss Region	Caledonized basement	A0722E1	Spencer 2013
6.0145	62.2227	U-Pb	Titanite	384.6	5	Western Gneiss Region	Caledonized basement	E1612I2	Spencer 2013
6.6653	62.69	U-Pb	Titanite	384.5	7.3	Western Gneiss Region	Caledonized basement	A0724H	Spencer 2013
6.0538	62.5686	U-Pb	Titanite	384.3	2	Western Gneiss Region	Caledonized basement	A0722J1	Spencer 2013
5.9826	61.9965	U-Pb	Titanite	384.3	8	Western Gneiss Region	Caledonized basement	K1727C1	Spencer 2013
5.1768	62.1032	U-Pb	Titanite	384.3	5.9	Western Gneiss Region	Caledonized basement	P6807C2	Spencer 2013
5.5392	62.1764	U-Pb	Titanite	384.2	8.1	Western Gneiss Region	Caledonized basement	P6815H1	Spencer 2013
5.4593	62.2133	U-Pb	Titanite	383.7	3.1	Western Gneiss Region	Caledonized basement	8907C6	Spencer 2013
6.6817	62.1098	U-Pb	Titanite	381.9	3.2	Western Gneiss Region	Caledonized basement	K1725B3	Spencer 2013
5.5213	62.3582	U-Pb	Titanite	381.9	1.9	Western Gneiss Region	Caledonized basement	R9825E1	Spencer 2013
5.19	62.1986	U-Pb	Titanite	381.4	5.6	Western Gneiss Region	Caledonized basement	P6806B1	Spencer 2013
6.7721	62.8068	U-Pb	Titanite	381.3	7.2	Western Gneiss Region	Caledonized basement	G9708Q4	Spencer 2013
6.6754	62.7187	U-Pb	Titanite	380	2	Western Gneiss Region	Caledonized basement	G9707R2	Spencer 2013
5.9867	62.2155	U-Pb	Titanite	380	5.4	Western Gneiss Region	Caledonized basement	P5626P1	Spencer 2013
5.1768	62.1032	U-Pb	Titanite	379	10	Western Gneiss Region	Caledonized basement	P6807D	Spencer 2013
5.4143	62.2615	U-Pb	Titanite	378.9	4.4	Western Gneiss Region	Caledonized basement	R9828C11	Spencer 2013
6.2378	62.6927	U-Pb	Titanite	378	2.5	Western Gneiss Region	Caledonized basement	A0721E2	Spencer 2013
6.2378	62.6927	U-Pb	Titanite	377.5	2.5	Western Gneiss Region	Caledonized basement	A0721E4	Spencer 2013
9.9472	63.9145	U-Pb	Zircon	438.8	8.8	Seve Nappe Complex	Caledonian nappes	NW13-103b	Gordon 2016
9.9472	63.9145	U-Pb	Zircon	435.9	8.7	Seve Nappe Complex	Caledonian nappes	NW13-103a	Gordon 2016
6.1304	61.8166	U-Pb	Zircon	429	4	Western Gneiss Region	Caledonian nappes	PE3	Young 2015
5.3378	61.9146	U-Pb	Zircon	1744	77	Western Gneiss Region	Caledonized basement	NW10-12	Gordon 2013
5.3456	62.0247	U-Pb	Zircon	1700	100	Western Gneiss Region	Caledonized basement	NW10-06	Gordon 2013
6.7246	62.7395	U-Pb	Zircon	1700	200	Western Gneiss Region	Caledonized basement	NW10-50	Gordon 2013
7.6563	62.4269	U-Pb	Zircon	1640	19	Western Gneiss Region	Caledonized basement	M8712B1	Kylander-Clark and Hacker 2014
4.9542	60.9753	U-Pb	Zircon	987	10	Western Gneiss Region	Caledonized basement	Z	Røhr 2004
6.3601	61.9291	U-Pb	Zircon	976	9	Western Gneiss Region	Caledonized basement	GD1	Young 2015
6.7181	61.1823	U-Pb	Zircon	969	12	Western Gneiss Region	Caledonized basement	2	Skar 2003
6.4466	61.1136	U-Pb	Zircon	969	8	Western Gneiss Region	Caledonized basement	4	Skar 2003
6.5878	61.5299	U-Pb	Zircon	966	2	Jølster granite, Western Gneiss Region	Caledonized basement	7	Skar 2003
5.2607	61.9857	U-Pb	Zircon	962	13	Western Gneiss Region	Caledonized basement	A0715M1	Kylander-Clark and Hacker 2014
8.0919	61.9169	U-Pb	Zircon	958	58	Western Gneiss Region	Caledonized basement	E1606O6	Kylander-Clark and Hacker 2014
6.9235	62.1289	U-Pb	Zircon	956	16	Western Gneiss Region	Caledonized basement	E9809C11	Kylander-Clark and Hacker 2014
7.201	62.2821	U-Pb	Zircon	940	100	Western Gneiss Region	Caledonized basement	E9805P8	Kylander-Clark and Hacker 2014
7.2632	61.9374	U-Pb	Zircon	924	17	Western Gneiss Region	Caledonized basement	E1608G10	Kylander-Clark and Hacker 2014
5.4059	62.13	U-Pb	Zircon	923	17	Western Gneiss Region	Caledonized basement	A0717B1	Kylander-Clark and Hacker 2014
6.9773	61.938	U-Pb	Zircon	923	18	Western Gneiss Region	Caledonized basement	E9816B7	Kylander-Clark and Hacker 2014
5.4082	62.0298	U-Pb	Zircon	900	100	Western Gneiss Region	Caledonized basement	A0715V1	Kylander-Clark and Hacker 2014
6.2043	61.7864	U-Pb	Zircon	420	30	Western Gneiss Region	Caledonized basement	GDS	Young 2015
6.3661	62.0065	U-Pb	Zircon	417	7	Western Gneiss Region	Caledonized basement	PA1	Young 2015
6.1025	61.9848	U-Pb	Zircon	417	4	Western Gneiss Region	Caledonized basement	PA2	Young 2015
10.1837	64.1558	U-Pb	Zircon	416	100	Northern Western Gneiss Region	Caledonized basement	NW13-100	Gordon 2016
6.1369	61.9454	U-Pb	Zircon	414	6	Western Gneiss Region	Caledonized basement	GA3	Young 2015
6.2473	61.9539	U-Pb	Zircon	413	4	Western Gneiss Region	Caledonized basement	PE2	Young 2015
5.5151	61.9265	U-Pb	Zircon	412	4	Western Gneiss Region	Caledonized basement	PE1	Young 2015
10.1759	64.1448	U-Pb	Zircon	410.3	8.2	Northern Western Gneiss Region	Caledonized basement	NW13-97B	Gordon 2016
10.1759	64.1448	U-Pb	Zircon	410.3	8.2	Northern Western Gneiss Region	Caledonized basement	NW12-22C	Gordon 2016
6.108	61.9802	U-Pb	Zircon	410	3	Western Gneiss Region	Caledonized basement	GD2	Young 2015
10.1759	64.1448	U-Pb	Zircon	408.6	8.2	Northern Western Gneiss Region	Caledonized basement	NW12-22B	Gordon 2016
5.4271	62.2632	U-Pb	Zircon	407.6	4.8	Western Gneiss Region	Caledonized basement	R9828C99	Kylander-Clark and Hacker 2014
10.1759	64.1448	U-Pb	Zircon	407.3	8.1	Northern Western Gneiss Region	Caledonized basement	NW12-22D	Gordon 2016
6.1025	61.9848	U-Pb	Zircon	407	5	Western Gneiss Region	Caledonized basement	GA2	Young 2015
10.1759	64.1448	U-Pb	Zircon	406.4	8.1	Northern Western Gneiss Region	Caledonized basement	NW13-97A	Gordon 2016
10.1759	64.1448	U-Pb	Zircon	405.3	8.1	Northern Western Gneiss Region	Caledonized basement	NW12-22I	Gordon 2016
5.01755	60.3933	U-Pb	Zircon	404.8	5.1	Øygarden Complex	Caledonized basement	OC-08	This study
6.1001	62.5007	U-Pb	Zircon	404.5	5.5	Western Gneiss Region	Caledonized basement	A0722F1	Kylander-Clark and Hacker 2014
10.1759	64.1448	U-Pb	Zircon	404.1	8.1	Northern Western Gneiss Region	Caledonized basement	NW12-22A	Gordon 2016
9.7391	63.6151	U-Pb	Zircon	403.8	8.1	Møre Trøndelag Fault Zone	Caledonized basement	NW13-105b	Gordon 2016
8.5164	62.6813	U-Pb	Zircon	403.5	1.4	Western Gneiss Region	Caledonized basement	K7710L2	Kylander-Clark and Hacker 2014
5.03972	60.3876	U-Pb	Zircon	404.8	5.2	Øygarden Complex	Caledonized basement	OC-02	This study
6.4891	62.7941	U-Pb	Zircon	403	3	Western Gneiss Region	Caledonized basement	NW10-56	Gordon 2013
6.8821	62.098	U-Pb	Zircon	402.5	4.2	Western Gneiss Region	Caledonized basement	E1631A	Kylander-Clark and Hacker 2014
6.0181	62.1728	U-Pb	Zircon	402.3	2	Western Gneiss Region (Blahø nappe)	Caledonized basement	E1612B5	Kylander-Clark and Hacker 2014
5.6316	62.3764	U-Pb	Zircon	400	20	Western Gneiss Region	Caledonized basement	NW10-36D	Gordon 2013
5.7207	62.3154	U-Pb	Zircon	399.8	4.8	Western Gneiss Region	Caledonized basement	A0718F3	Kylander-Clark and Hacker 2014
5.00624	60.3338	U-Pb	Zircon	399.2	3.8	Øygarden Complex	Caledonized basement	OC-09	This study
5.5507	62.247	U-Pb	Zircon	399.4	4.3	Western Gneiss Region	Caledonized basement	8815G8	Kylander-Clark and Hacker 2014
6.4891	62.7941	U-Pb	Zircon	399	4	Western Gneiss Region	Caledonized basement	NW10-54	Gordon 2013
5.6316	62.3764	U-Pb	Zircon	398	6	Western Gneiss Region	Caledonized basement	NW10-36E	Gordon 2013
6.7246	62.7395	U-Pb	Zircon	398	14	Western Gneiss Region	Caledonized basement	NW10-45E	Gordon 2013
6.4891	62.7941	U-Pb	Zircon	397	6	Western Gneiss Region	Caledonized basement	NW10-55	Gordon 2013
6.2235	62.4699	U-Pb	Zircon	396.4	4.5	Western Gneiss Region	Caledonized basement	A0720M1	Kylander-Clark and Hacker 2014
5.7164	62.315	U-Pb	Zircon	395.9	4.5	Western Gneiss Region	Caledonized basement	A0718H1	Kylander-Clark and Hacker 2014
5.6989	62.2964	U-Pb	Zircon	395.2	4.3	Western Gneiss Region	Caledonized basement	P5701A	Kylander-Clark and Hacker 2014
6.4891	62.7941	U-Pb	Zircon	393	2	Western Gneiss Region	Caledonized basement	NW10-53B	Gordon 2013
6.1209	62.5874	U-Pb	Zircon	391.5	4.7	Western Gneiss Region	Caledonized basement	A0722G4	Kylander-Clark and Hacker 2014
5.0517	61.9426	U-Pb	Zircon	389.1	4.2	Western Gneiss Region	Caledonized basement	K7717K	Kylander-Clark and Hacker 2014
5.4692	61.1363	U-Pb	Zircon	1621	3	Mølmesdal Gabbro complex, Western Gneiss Region	Caledonized basement?	1	Skar 2003
6.43951	62.7316	U-Pb	Zircon	394	6	Western Gneiss Region	Caledonized basement	JB10-62	Butler 2018
6.44272	62.7284	U-Pb	Zircon	388	1.3	Western Gneiss Region	Caledonized basement	JB10-57	Butler 2018
6.44963	62.7263	U-Pb	Zircon	392	15	Western Gneiss Region	Caledonized basement	JB10-51	Butler 2018
6.24072	62.6927	U-Pb	Zircon	396	4	Western Gneiss Region	Caledonized basement	C	Krogh 2011
6.17188	62.6552	U-Pb	Zircon	390	2	Western Gneiss Region	Caledonized basement	F	Krogh 2011
6.37789	62.7102	U-Pb	Zircon	395	2	Western Gneiss Region	Caledonized basement	G	Krogh 2011
7.37916	62.9748	U-Pb	Zircon	395.2	1.3	Western Gneiss Region	Caledonized basement	K	Krogh 2011
7.88344	62.99	U-Pb	Zircon	395.3	1.8	Western Gneiss Region	Caledonized basement	L	Krogh 2011
6.73855	62.7329	U-Pb	Rutile	375	4	Western Gneiss Region	Caledonized basement	15-02-RT	Cutts 2019	approximate locations
6.68887	62.727	U-Pb	Rutile	379	4	Western Gneiss Region	Caledonized basement	14-03-MA	Cutts 2019	approximate locations
6.41686	62.7047	U-Pb	Rutile	381	6	Western Gneiss Region	Caledonized basement	15-05-FJ	Cutts 2019	approximate locations
6.99678	62.3129	U-Pb	Rutile	379	4	Western Gneiss Region	Caledonized basement	15-10-ST	Cutts 2019	approximate locations
6.86674	62.087	U-Pb	Rutile	399	6	Western Gneiss Region	Caledonized basement	15-14-HE	Cutts 2019	approximate locations
7.64974	62.0053	U-Pb	Rutile	398	9	Western Gneiss Region	Caledonized basement	15-13-GR	Cutts 2019	approximate locations
